# Supplementary material for: Normative values for musculoskeletal- and neuromotor fitness in apparently healthy Norwegian adults and the association with obesity: a cross-sectional study
Source: BMC Sports Sci Med Rehabil. 2016 Nov 18;8:37. doi: 10.1186/s13102-016-0059-4 (PMC5116214; doi:10.1186/s13102-016-0059-4)
Supplement: Additional file 2: — Availability of data. The available data generated or analyzed for this research article. (XLSX 247 kb) [file 13102_2016_59_MOESM2_ESM.xlsx]

## Sheet: Data
ID number	Gender F=0, M=1	Age years	Age 10yr groups	Weight (KG)	Height (m)	BMI	BMI groups	Waist circumference (cm)	WC WHO groups	Educational level	SBE 8sec)	HGS (kg)	OLS (sec)	MPU (no)	MPUK (no)	SR (cm)	BSC (cm)	EPP (cm)	VJ (cm)	SBE z-score	HGS z-score	OLS z-score	MPU z-score	MPUK z-score	SR z-score	BSC z-score	EPP z-score	VJ z-score
1	0	21.05	1	59.2	1.7	20.48	0	64.13	0	2	28	32	76	16		24	13.5			-1.21	-0.86	0.86	1.02		0.2	1.81
2	0	24.43	1	58.7	1.73	19.73	0	65.33	0	4	110	26	107	10		45.5	3.75			0.62	-1.29	2.21	-0.2		1.88	0.87
3	0	25.29	1	57	1.62	21.72	0	67.17	0	2	98	25	77	14		34	5.5			0.35	-1.36	0.9	0.61		0.98	1.04
4	0	21.38	1	66.1	1.76	21.34	0	81.67	1	2	135	34	67		11	12	5.5		29	1.17	-0.71	0.46		0.67	-0.74	1.04		-0.24
5	0	28.01	1	60.7	1.51	26.73	1	81.03	1	4	95	26	97	13		40	0			0.28	-1.29	1.78	0.41		1.45	0.51
6	0	23.34	1	69.7	1.74	23.02	0	77.33	0	2	126	31	64		10	44	7.25		32	0.97	-0.93	0.33		0.44	1.76	1.21		0.05
7	0	27.4	1	53.5	1.63	20.26	0	76.25	0	2	120	40	100	7		33	8.5		37	0.84	-0.28	1.91	-0.82		0.9	1.33		0.53
8	0	27.83	1	67.7	1.75	22.06	0	79	0	3	137	32	70	13		-14	5.5		29	1.22	-0.86	0.59	0.41		-2.77	1.04		-0.24
9	0	29.37	1	72.5	1.72	24.65	0	76.75	0	2	58	34	80		14	-11	0		42	-0.54	-0.71	1.03		1.33	-2.54	0.51		1.02
10	0	23.81	1	66.3	1.71	22.67	0	73.33	0	3	103	28	120		0	0	-11.5	22.3	30.5	0.46	-1.14	2.79		-1.78	-1.68	-0.6	-0.27	-0.1
11	0	26.45	1	66.4	1.69	23.25	0	73	0	4	94	42	67	11		27	-8.5	32.7	39	0.26	-0.14	0.46	0		0.43	-0.31	1.05	0.73
12	0	26.74	1	70.6	1.77	22.54	0	76.5	0	4	120	33	68	10		42	-13	23.7	25.5	0.84	-0.78	0.5	-0.2		1.6	-0.74	-0.09	-0.58
13	0	27.33	1	50.2	1.59	19.86	0	69.25	0	4	58	30	120	0	0	26.5	1.5	24.8	31	-0.54	-1	2.79	-2.24	-1.78	0.39	0.65	0.05	-0.05
14	0	21.23	1	71	1.83	21.2	0	74.5	0	2	60		74		6	2	4.5	21.8		-0.5		0.77		-0.44	-1.52	0.94	-0.33
15	0	21.81	1	55	1.67	19.72	0	74.33	0	2	182	34	69	6		27.5	4.75	28.5		2.22	-0.71	0.55	-1.02		0.47	0.97	0.52
16	0	24.86	1	58.5	1.66	21.31	0	75.25	0	3	187	28	63		13	13	-4.25	24.14		2.33	-1.14	0.29		1.11	-0.66	0.1	-0.03
17	0	29.88	1	66	1.69	23.11	0	77.5	0	4	90	43	69	7		24.5	1.25	25.1		0.17	-0.06	0.55	-0.82		0.23	0.63	0.09
18	0	25.67	1	63.3	1.72	21.4	0	83.5	1	2	90	30	43		13	22	5		28	0.17	-1	-0.59		1.11	0.04	0.99		-0.34
19	0	26.33	1	64.8	1.7	22.37	0	81.67	1	3	121	33	67	13		28	-3.5		24.5	0.86	-0.78	0.46	0.41		0.51	0.17		-0.68
20	0	28.74	1	74.6	1.81	22.77	0	83.1	1	3	59	33	25		5	34.5	3	19.4		-0.52	-0.78	-1.38		-0.67	1.02	0.8	-0.63
21	0	27.18	1	72.9	1.86	21.07	0	84.17	1	4	153	29	68	8		20	10			1.57	-1.07	0.5	-0.61		-0.12	1.47
22	0	29.88	1	66.7	1.6	26.05	1	83.53	1	2	104	33	68	16		45	3.75	20.36	23	0.48	-0.78	0.5	1.02		1.84	0.87	-0.51	-0.83
23	0	29.99	1	59.2	1.63	22.28	0	85.17	1	4	168	24	120	13		33.5	1.25	26.23	33	1.91	-1.43	2.79	0.41		0.94	0.63	0.23	0.15
24	0	22.36	1	60	1.7	20.76	0	83	1	2	180	36	73	10		38	9	27.6		2.18	-0.57	0.72	-0.2		1.29	1.38	0.41
25	0	22.68	1	67.5	1.67	24.35	0	80.83	1	2	105	39	62	11		22	-3.5	24.65		0.51	-0.35	0.24	0		0.04	0.17	0.03
26	0	23.09	1	72	1.76	23.24	0	80.25	1	3		40	63			23.5	5.25	27.61			-0.28	0.29			0.16	1.01	0.41
27	0	27.38	1	62.2	1.71	21.27	0	82.5	1	3	120	39	74	16		50	7.5	25.3		0.84	-0.35	0.77	1.02		2.23	1.23	0.11
28	0	28.27	1	64	1.71	21.89	0	86.33	1	4	75	48	73	15		27.5	-5.25	29.9		-0.16	0.29	0.72	0.82		0.47	0	0.7
29	0	26.85	1	68.8	1.7	23.81	0	97.17	2	4	53	36	3	4		26	5.75	26.4		-0.65	-0.57	-2.35	-1.43		0.35	1.06	0.25
30	0	22.18	1	87	1.8	26.85	1	92.5	2	3	75	43	65	5		24	7	23.1		-0.16	-0.06	0.37	-1.22		0.2	1.18	-0.16
31	0	24.1	1	73	1.51	32.02	2	94	2	2	75	30	109	11		32	-7	19.3		-0.16	-1	2.3	0		0.82	-0.16	-0.65
32	0	24.48	1	65.5	1.76	21.15	0	91.5	2	4	126	29	63		7	18	7.5	20.7		0.97	-1.07	0.29		-0.22	-0.27	1.23	-0.47
33	0	24.66	1	72.5	1.71	24.79	0	91	2	2	60	39	63	8		23	4.25	22.7		-0.5	-0.35	0.29	-0.61		0.12	0.92	-0.22
34	0	27.42	1	86	1.74	28.41	1	103.83	2	2	60	30	66		7	25	-13.5	23.17		-0.5	-1	0.42		-0.22	0.27	-0.79	-0.16
35	0	26.85	1	61.5	1.68	21.79	0	73.5	0	3	108	30	74		0	18	7.5	16.8	25.5	0.57	-1	0.77		-1.78	-0.27	1.23	-0.96	-0.58
36	0	21.31	1	67.2	1.57	27.26	1	81.33	1	2	95	40	64		7	2	-6.25		26	0.28	-0.28	0.33		-0.22	-1.52	-0.09		-0.53
37	0	26.33	1	84	1.52	36.36	2	102	2	2	10	22	60		0	22	-23		21	-1.61	-1.58	0.15		-1.78	0.04	-1.7		-1.02
351	1	27.66	1	93.3	1.75	30.47	2	90.5	0	1	104	72	83	20		20	-13.5			0.48	2.02	1.16	1.84		-0.12	-0.79
352	1	28.81	1	73	1.77	23.43	0	80	0	2	93	54	76	12		28.5	19.25	30.2		0.24	0.73	0.86	0.2		0.55	2.36	0.73
353	1	24.38	1	59.9	1.75	19.56	0	71.67	0	2	150	42	64.47	10		27	3.5		21.5	1.51	-0.14	0.35	-0.2		0.43	0.85		-0.97
354	1	27.34	1	71.4	1.75	23.31	0	80	0	2	71	54	63	13		35	7.5		44	-0.25	0.73	0.29	0.41		1.05	1.23		1.21
355	1	28.78	1	75.1	1.82	22.8	0	85.5	0		120	48	62	16		17	0		42	0.84	0.29	0.24	1.02		-0.35	0.51		1.02
356	1	27.49	1	57.9	1.73	19.46	0	72.5	0	2	111	60	96	14		14	6.5		54	0.64	1.16	1.73	0.61		-0.59	1.13		2.18
357	1	29.04	1	76.3	1.8	23.55	0	81.67	0	3	67	35	34	10		15	-1	27.2	39.5	-0.34	-0.64	-0.99	-0.2		-0.51	0.41	0.35	0.78
358	1	28.4	1	70.8	1.83	21.14	0	81.33	0	3		54	65	24		18.5	2	37.3	52		0.73	0.37	2.65		-0.23	0.7	1.63	1.99
359	1	29.34	1	69.1	1.82	20.86	0	80.1	0	2	139	51	68	16		15.5	5	27.1	39	1.26	0.51	0.5	1.02		-0.47	0.99	0.34	0.73
360	1	21.57	1	93.5	1.91	25.63	1	88.75	0	2	39	78	64	13		6	2.25	37	45.5	-0.96	2.45	0.33	0.41		-1.21	0.73	1.59	1.36
361	1	27.06	1	68	1.73	22.72	0	80.5	0	4	72	68	84	14		12	-0.25	42.2	45	-0.23	1.73	1.21	0.61		-0.74	0.49	2.25	1.31
362	1	27.1	1	84.6	1.86	24.45	0	87.75	0	2	38	64	64	12		28	-12	39.4	50	-0.99	1.45	0.33	0.2		0.51	-0.64	1.9	1.8
363	1	28.28	1	84	1.82	25.36	1	91.75	0	2	47	58	86	11		19	-2.5	35.7	49	-0.79	1.01	1.29	0		-0.2	0.27	1.43	1.7
364	1	20.99	1	73	1.78	23.04	0	79	0	2	55	62	64	14		33.5	-15.5		54	-0.61	1.3	0.33	0.61		0.94	-0.98		2.18
365	1	22.02	1	77	1.81	23.5	0	81	0	3	142	55	84	11		20	13		51	1.33	0.8	1.21	0		-0.12	1.76		1.89
366	1	27.96	1	95.5	1.89	26.73	1	87	0	2	104	81	73	17		33	12		45	0.48	2.63	0.72	1.22		0.9	1.66		1.31
367	1	29.08	1	80	1.9	22.16	0	92.83	0	4	95	57	52	16		17	3	38.4		0.28	0.94	-0.2	1.02		-0.35	0.8	1.77
368	1	22.62	1	74.5	1.85	21.77	0	77	0	2	138	62	81	15		30	3	39.1		1.24	1.3	1.07	0.82		0.66	0.8	1.86
369	1	23.34	1	76.2	1.88	21.56	0	79	0	4	95	64	75	14		19	-2.75	44.2		0.28	1.45	0.81	0.61		-0.2	0.25	2.51
370	1	23.91	1	76	1.83	22.69	0	79	0	2	120	64	63	14		35	3	44.2		0.84	1.45	0.29	0.61		1.05	0.8	2.51
371	1	25.26	1	66	1.82	20.04	0	76	0	4	160	50	64	16		24.5	12	35.9		1.73	0.44	0.33	1.02		0.23	1.66	1.46
372	1	25.8	1	80	1.85	23.37	0	87.33	0	3	120	56	64	17		21.5	-3.5	34.4		0.84	0.87	0.33	1.22		0	0.17	1.27
373	1	26.49	1	84.5	1.93	22.8	0	82.67	0	3	123	54	66	18		29	-1	35.9		0.91	0.73	0.42	1.43		0.59	0.41	1.46
374	1	28.68	1	71.2	1.86	20.69	0	85	0	4	105	50	62	16		24.5	4.25	42.4		0.51	0.44	0.24	1.02		0.23	0.92	2.28
375	1	29.1	1	81.5	1.93	21.88	0	86.75	0	3	100	74	64.5	18		32	10.25	34.65		0.39	2.17	0.35	1.43		0.82	1.5	1.3
376	1	23.1	1	92.9	1.85	27.14	1	94.33	1	2	68	64	66	12		43	-1.5	34.4	45	-0.32	1.45	0.42	0.2		1.68	0.37	1.27	1.31
377	1	28.78	1	85.8	1.81	26.19	1	94.67	1	4	115	46	71	19		14.5	6.25	31.5		0.73	0.15	0.64	1.63		-0.55	1.11	0.9
378	1	28.53	1	102.2	1.82	31.02	2	110.83	2	3	68	57	79	10		15	-7.5	32.8	46.5	-0.32	0.94	0.99	-0.2		-0.51	-0.21	1.06	1.46
379	1	23.79	1	81.8	1.9	22.66	0	79.83	0	3	64	47	64	13		17.5	2			-0.41	0.22	0.33	0.41		-0.31	0.7
380	1	24.15	1	80.3	1.82	24.32	0	91.25	0	2	42	60	67	13		-11	2		46	-0.9	1.16	0.46	0.41		-2.54	0.7		1.41
381	1	21.44	1	91	1.87	26.02	1	91.17	0	2	52	51	62	8		17	2	33.6	35.5	-0.67	0.51	0.24	-0.61		-0.35	0.7	1.16	0.39
382	1	29.47	1	78.5	1.79	24.5	0	86	0	4	58	51	72	16		16	-16.5	33.7		-0.54	0.51	0.68	1.02		-0.43	-1.08	1.18
383	1	28.65	1	91	1.82	27.47	1	100.33	1	4	61	54	58	16		27	1.5		48	-0.47	0.73	0.07	1.02		0.43	0.65		1.6
384	1	26.21	1	86	1.82	25.96	1	100	1	4	56.4	46	77	10		12	-6.5		32	-0.58	0.15	0.9	-0.2		-0.74	-0.12		0.05
385	1	27.53	1	98.2	1.82	29.65	1	96.25	1	3	59	57	62	11		19	-16.5		43	-0.52	0.94	0.24	0		-0.2	-1.08		1.12
386	1	29.56	1	92	1.88	26.03	1	97	1	4	63	65	44	14		-3	0	34.6	69	-0.43	1.52	-0.55	0.61		-1.91	0.51	1.29	3.64
387	1	29.28	1	88	1.72	29.75	1	98.67	1	1	122	85	20	13		46	6.5		42	0.88	2.96	-1.6	0.41		1.91	1.13		1.02
388	1	25.07	1	88	1.81	26.86	1	95.5	1	3	80	62	62	16		12.5	-4	43.2		-0.05	1.3	0.24	1.02		-0.7	0.12	2.38
389	1	28.24	1	103.7	1.81	31.83	2	104.5	2	2	31	60	67		11	16	-23.5		30	-1.14	1.16	0.46		0.67	-0.43	-1.75		-0.15
390	1	28.24	1	100	1.81	30.63	2	104.5	2	4	8	50	65	13		15	-8.5		48	-1.65	0.44	0.37	0.41		-0.51	-0.31		1.6
38	0	30.85	2	83	1.68	29.41	1	76.17	0	4	77	27	73	7		31	7.5			-0.12	-1.22	0.72	-0.82		0.74	1.23
39	0	31.82	2	55.5	1.71	19.09	0	65	0	4	240	31	102	2		36	3.75			3.51	-0.93	2	-1.84		1.13	0.87
40	0	34.28	2	61.5	1.65	22.59	0	66.17	0	4	136	30	75	6	14	45.5	12			1.2	-1	0.81	-1.02	1.33	1.88	1.66
41	0	34.64	2	60.4	1.67	21.66	0	68	0	3	115	28	65		14	33	-1.25			0.73	-1.14	0.37		1.33	0.9	0.39
42	0	30.08	2	54.6	1.71	18.78	0	69	0	3	156	30	76	14		20	12		40	1.64	-1	0.86	0.61		-0.12	1.66		0.83
43	0	32.23	2	62.4	1.6	24.23	0	75.35	0	4	76	31	75	8		-23	4.5		26	-0.14	-0.93	0.81	-0.61		-3.48	0.94		-0.53
44	0	31.87	2	61.4	1.71	21	0	69	0	3	185	36	73	8		48	17.5		40	2.29	-0.57	0.72	-0.61		2.07	2.19		0.83
45	0	33.07	2	69.3	1.73	23.15	0	74.5	0	2	120	42	101	18		44	4.25	38.2	38	0.84	-0.14	1.95	1.43		1.76	0.92	1.75	0.63
46	0	31.74	2	64	1.69	22.41	0	75	0	4	134	42	67	8		42	9.5	20.96		1.15	-0.14	0.46	-0.61		1.6	1.42	-0.44
47	0	33.97	2	62.5	1.67	22.55	0	69.67	0	4	169	38	72		15	41.5	10.5	24.9		1.93	-0.42	0.68		1.56	1.56	1.52	0.06
48	0	33.97	2	64	1.66	23.23	0	78.75	0	4	180	35	63		13	42	9.5	24.01		2.18	-0.64	0.29		1.11	1.6	1.42	-0.05
49	0	34.77	2	50	1.59	19.78	0	75.5	0	4	103	28	87	15		46	5.5	21		0.46	-1.14	1.34	0.82		1.91	1.04	-0.43
50	0	34.74	2	56.5	1.65	20.75	0	81.75	1	4	124	29	95	13		16	-2.75		28.5	0.93	-1.07	1.69	0.41		-0.43	0.25		-0.29
51	0	33.49	2	84.5	1.73	28.23	1	85	1	2	63	31	67		7	7	6	10.4	15	-0.43	-0.93	0.46		-0.22	-1.13	1.09	-1.77	-1.6
52	0	30.73	2	78	1.59	30.89	2	84.83	1	2	122	25	65		15	17	-9.5			0.88	-1.36	0.37		1.56	-0.35	-0.4
53	0	32.11	2	66.9	1.6	26.13	1	81	1	3	62	36	67	9		27	4.25	26.7	34	-0.45	-0.57	0.46	-0.41		0.43	0.92	0.29	0.24
54	0	33.41	2	83.4	1.68	29.55	1	86.83	1	3	44.4	36	65		5	3	0.5	26.7	29.5	-0.84	-0.57	0.37		-0.67	-1.45	0.56	0.29	-0.19
55	0	34.71	2	71.5	1.72	24.31	0	81.75	1	4	120	44	65	12		39	5.35	25.39		0.84	0.01	0.37	0.2		1.37	1.02	0.13
56	0	30.46	2	84.8	1.69	29.69	1	96	2	2	58	23	68		10	27	4.5	17.8	30	-0.54	-1.5	0.5		0.44	0.43	0.94	-0.84	-0.15
57	0	30.89	2	73.4	1.55	30.41	2	95	2	4	82	30	70	12		7	-13		31	-0.01	-1	0.59	0.2		-1.13	-0.74		-0.05
58	0	30.77	2	80	1.74	26.42	1	91.67	2	4	94	26	82		5	42	0		30	0.26	-1.29	1.12		-0.67	1.6	0.51		-0.15
59	0	32.59	2	60.9	1.54	25.85	1	78.25	0	4	81	26	120		10	-12	1		27	-0.03	-1.29	2.79		0.44	-2.62	0.61		-0.44
60	0	34.78	2	62.5	1.66	22.68	0	75	0	4	70	39	65	7		29.5	5	21.8		-0.27	-0.35	0.37	-0.82		0.63	0.99	-0.33
61	0	32.2	2	77	1.73	25.88	1	82.75	1	2	69	24	61.6		0	22	0.75	18.7	22	-0.3	-1.43	0.22		-1.78	0.04	0.58	-0.72	-0.92
62	0	33.87	2	73.8	1.78	23.29	0	86.67	1	1	115	38	63		8	34	9.5		28	0.73	-0.42	0.29		0	0.98	1.42		-0.34
63	0	32.39	2	98.3	1.77	31.38	2	91.67	2	2	62	40	65		7	42	6		23.5	-0.45	-0.28	0.37		-0.22	1.6	1.09		-0.78
64	0	31.64	2	90	1.63	33.87	2	95	2	3	25	28	20		8	20	-14	12.2	15	-1.28	-1.18	-1.6		0	-0.12	-0.84	-1.54	-1.6
65	0	32.91	2	92	1.69	32.21	2	91.5	2	4	95	32	20		9	39	9.5	21.62	29	0.28	-0.86	-1.6		0.22	1.37	1.42	-0.35	-0.24
66	0	39.61	2	82	1.67	29.4	1	89	2	4	36	32	79		8	11	-22.5	21.51	32.7	-1.03	-0.86	0.99		0	-0.82	-1.65	-0.37	0.12
67	0	39.7	2	66	1.68	23.38	0	75.67	0	4	152	42	67	17		42	7.5		38	1.55	-0.14	0.46	1.22		1.6	1.23		0.63
68	0	36.06	2	62.5	1.77	19.95	0	75	0	4	91	30	70	12		-14	-6	19.9	34	0.19	-1	0.59	0.2		-2.77	-0.07	-0.57	0.24
69	0	38.66	2	64.6	1.64	24.02	0	75	0	3	95	35	64	13		31	0	18	27.5	0.28	-0.64	0.33	0.41		0.74	0.51	-0.81	-0.39
70	0	35.84	2	65.9	1.65	24.35	0	76	0	4	140	32	72		12	32.5	0			1.29	-0.86	0.68		0.89	0.86	0.51
71	0	36.81	2	56.5	1.63	21.27	0	64.83	0	4	100	31	80		18	36	10.75			0.39	-0.93	1.03		2.22	1.13	1.54
72	0	35.38	2	55.2	1.7	19.1	0	70	0	4	209	26	15	9		32		23	34	2.82	-1.29	-1.82	-0.41		0.82		-0.18	0.24
73	0	37.75	2	52.8	1.6	20.62	0	79.17	0	3	65	25	41	3		31		19.6	24.5	-0.39	-1.36	-0.68	-1.63		0.74		-0.61	-0.68
74	0	35.95	2	61.4	1.6	24.13	0	77.83	0	3	95	32	70	14		39.5	2	19.6	28.5	0.28	-0.86	0.59	0.61		1.41	0.7	-0.61	-0.29
75	0	37.64	2	62.4	1.66	22.64	0	74.43	0	2	153	33	68	11		29.5	-0.5	22.9	26	1.57	-0.78	0.5	0		0.63	0.46	-0.19	-0.53
76	0	35.68	2	66	1.64	24.54	0	78.03	0	3	57.8	36	30		7	38	7.4	20	29	-0.55	-0.57	-1.16		-0.22	1.29	1.22	-0.56	-0.24
77	0	38.3	2	74.7	1.74	24.67	0	78.17	0	4	137	36	120	1	7	49	8	29.7	40.5	1.22	-0.57	2.79	-2.04	-0.22	2.15	1.28	0.67	0.87
78	0	35.73	2	69	1.73	23.05	0	79	0	4	157	34	78		10	40	4.5	25.63	30	1.66	-0.71	0.94		0.44	1.45	0.94	0.16	-0.15
79	0	35.41	2	61.5	1.68	21.79	0	74.17	0	3	94	32	67	9		38	7		41	0.26	-0.86	0.46	-0.41		1.29	1.18		0.92
80	0	36.1	2	61	1.61	23.53	0	78.67	0	4	155	31	66	17		22	-1.25		32	1.62	-0.93	0.42	1.22		0.04	0.39		0.05
81	0	36.64	2	57.5	1.67	20.62	0	67	0	4	160	42	62	14		32	6.75		40	1.73	-0.14	0.24	0.61		0.82	1.16		0.83
82	0	37.23	2	46.3	1.6	18.09	0	65	0	4	145	29	75	7		38	5		33	1.4	-1.07	0.81	-0.82		1.29	0.99		0.15
83	0	39.24	2	65.2	1.71	22.3	0	79	0	3	58	48	63	5		45	6.5		30	-0.54	0.29	0.29	-1.22		1.84	1.13		-0.15
84	0	36.97	2	60.2	1.69	21.2	0	57	0	4	130	32	28	11		25	10.5	24.7		1.06	-0.86	-1.25	0		0.27	1.52	0.04
85	0	36.38	2	53.5	1.66	19.42	0	75.33	0	4	132	29	69	8		22	4.5	25.2		1.11	-1.07	0.55	-0.61		0.04	0.94	0.1
86	0	36.64	2	68	1.69	23.81	0	73.77	0	4	145	42	98	19		60	2.5	27.41		1.4	-0.14	1.82	1.63		3.01	0.75	0.38
87	0	38.87	2	50.5	1.67	18.11	0	74.33	0	4	110	34	65	13		29	12	24.7		0.62	-0.71	0.37	0.41		0.59	1.66	0.04
88	0	37.91	2	76.1	1.72	25.72	1	86.33	1	3	68	36	63		9	25	-4		32	-0.32	-0.57	0.29		0.22	0.27	0.12		0.05
89	0	37.49	2	68	1.79	21.22	0	80	1	2	64	30	70		5	21	10.75	16.8	23.5	-0.41	-1	0.59		-0.67	-0.04	1.54	-0.96	-0.78
90	0	37.64	2	59	1.61	22.76	0	85.67	1	4	122	32	66		10	32	5	21.1		0.88	-0.86	0.42		0.44	0.82	0.99	-0.42
91	0	36.76	2	63.2	1.64	23.5	0	82.27	1	3	180	26	40	9		29	7	21.01	31	2.18	-1.29	-0.72	-0.41		0.59	1.18	-0.43	-0.05
92	0	37.35	2	74.5	1.64	27.87	1	84.17	1	2	116	45	63	5		34	-8		31	0.75	0.08	0.29	-1.22		0.98	-0.26		-0.05
93	0	37.52	2	65.1	1.67	23.34	0	84.67	1	4	240	43	79	7		34	1		36	3.51	-0.06	0.99	-0.82		0.98	0.61		0.44
94	0	36.42	2	58.5	1.64	21.88	0	84.33	1	3	240	31	65	6		37	8.25	21.4		3.51	-0.93	0.37	-1.02		1.21	1.3	-0.38
95	0	37.73	2	67.3	1.68	23.84	0	83.33	1	4	160	38	73		15	34	4	23.3		1.73	-0.42	0.72		1.56	0.98	0.89	-0.14
96	0	36.97	2	64.8	1.61	25	0	88.67	2	4	88	30	46	13		34.5	-2.25		28	0.13	-1	-0.46	0.41		1.02	0.29		-0.34
97	0	39.41	2	87.1	1.7	30.14	2	104	2	2	120	38	34	10		15	-14.75		29	0.84	-0.42	-0.99	-0.2		-0.51	-0.91		-0.24
98	0	39.96	2	57.7	1.69	20.2	0	91.5	2	4	68	28	71		9	28.5	2.5		24	-0.32	-1.14	0.64		0.22	0.55	0.75		-0.73
99	0	35.77	2	84	1.77	26.81	1	96	2	3	72	34	73		8	30	-1.5		26.5	-0.23	-0.71	0.72		0	0.66	0.37		-0.49
100	0	37.89	2	73.8	1.63	27.78	1	90	2	4	119	45	104.2	8		37.5	-1.5		41	0.82	0.08	2.09	-0.61		1.25	0.37		0.92
101	0	36.45	2	74	1.79	23.1	0	88.83	2	2	54	30	66	0	6	29	0	20.4	26	-0.63	-1	0.42	-2.24	-0.44	0.59	0.51	-0.51	-0.53
102	0	38.88	2	79.7	1.63	30	1	102.23	2	4	78	33	65	8		20.5	-7.5	24.7	33.5	-0.1	-0.78	0.37	-0.61		-0.08	-0.21	0.04	0.19
103	0	39.11	2	90.3	1.7	31.25	2	101.33	2	1	64	34	26		6	14	-3.5		19	-0.41	-0.71	-1.34		-0.44	-0.59	0.17		-1.21
104	0	38.58	2	81	1.63	30.67	2	95.33	2	4	49	42	67	9		20.5	-15		34	-0.74	-0.14	0.46	-0.41		-0.08	-0.93		0.24
105	0	35.48	2	65	1.68	23.03	0	88.5	2	3	180	42	64	10		32	5	24.76		2.18	-0.14	0.33	-0.2		0.82	0.99	0.05
106	0	39.15	2	67.7	1.73	22.62	0	93.67	2	4	62	32	67		5	26	6	20.6		-0.45	-0.86	0.46		-0.67	0.35	1.09	-0.48
107	0	35.72	2	71	1.7	24.57	0	86.83	1	2	128	26	70		0	28.5	-23	16.9	18.5	1.02	-1.29	0.59		-1.78	0.55	-1.7	-0.95	-1.26
108	0	35.96	2	84	1.64	31.23	2	93	2	2	60	40	66	5		30.5	-8		24	-0.5	-0.28	0.42	-1.22		0.7	-0.26		-0.73
109	0	39.56	2	86.8	1.73	29	1	96.33	2	4	72	38	82	7		39	-4.5		24	-0.23	-0.42	1.12	-0.82		1.37	0.08		-0.73
110	0	39.24	2	110	1.74	36.33	2	114.33	2	4	74	45	70		11	13.5	-1	20.32		-0.18	0.08	0.59		0.67	-0.63	0.41	-0.52
391	1	31.34	2	75.6	1.71	25.85	1	81.33	0	4	121	62	75	23		22	-4			0.86	1.3	0.81	2.45		0.04	0.12
392	1	31.79	2	86.7	1.8	26.76	1	86.17	0	4	55	63	72	21		23	-13.25			-0.61	1.37	0.68	2.04		0.12	-0.76
393	1	33.59	2	77.8	1.8	24.01	0	82.33	0	4	120	52	92	25		29	13.5			0.84	0.58	1.56	2.86		0.59	1.81
394	1	34.42	2	58	1.74	19.27	0	71.5	0	4	80	51	65	17		34	6.5			-0.05	0.51	0.37	1.22		0.98	1.13
395	1	34.65	2	87.4	1.84	25.82	1	88.17	0	3	84	66	82	14		12	3.5			0.04	1.59	1.12	0.61		-0.74	0.85
396	1	32.12	2	84	1.86	24.28	0	89	0	4	75	68	68	13		31.5	15.75		59	-0.16	1.73	0.5	0.41		0.78	2.02		2.67
397	1	34.71	2	97	1.79	30.27	2	111.17	2	2	60	52	65	8		8	-19.5	31.23	45	-0.5	0.58	0.37	-0.61		-1.05	-1.37	0.86	1.31
398	1	30.05	2	77.3	1.84	22.83	0	85	0	4	67	42	82	13		11	11.75		42	-0.34	-0.14	1.12	0.31		-0.82	1.64		1.02
399	1	31.58	2	80.8	1.77	25.79	1	93.25	0	4	82	36	63	13		13	-5		24.5	-0.01	-0.57	0.29	0.41		-0.66	0.03		-0.68
400	1	33.99	2	95	1.87	27.17	1	91	0	2	46	54	26	15		35	2.75			-0.81	0.73	-1.34	0.82		1.05	0.77
401	1	31.89	2	74	1.85	21.74	0	73.33	0	4	90	49	68	26		33.5	5			0.17	0.37	0.5	3.06		0.94	0.99
402	1	33	2	86.4	1.84	25.66	1	82.83	0	4	66	59	110	16		28	-9.5			-0.36	1.09	2.35	1.02		0.51	-0.4
403	1	34.12	2	85.8	1.88	24.28	0	84.67	0	4	86	42	14	18		21.8		31.7	46	0.08	-0.14	-1.86	1.43		0.02		0.92	1.41
404	1	34.18	2	77.1	1.75	25.18	1	86.23	0	3	48	70	65	20		23.5	-7.5	32.6	49	-0.76	1.88	0.37	1.84		0.16	-0.21	1.04	1.7
405	1	33.49	2	80.3	1.76	25.92	1	88.17	0	4	137	68	65	7		42	-4	46.6	38.5	1.22	1.73	0.37	-0.82		1.6	0.12	2.81	0.68
406	1	34.97	2	71.2	1.83	21.26	0	85.5	0	4	68	69	71	8		22	8.25	34.4	49.5	-0.32	1.81	0.64	-0.61		0.04	1.3	1.27	1.75
407	1	30.42	2	80.7	1.92	21.89	0	83.47	0	2	70	57	63	11		19	-23.5	33.81	43.5	-0.27	0.94	0.29	0		-0.2	-1.75	1.19	1.17
408	1	31.61	2	68.2	1.77	21.77	0	82.83	0	4	69	56	67	21		24	1.25		50	-0.3	0.87	0.46	2.04		0.2	0.63		1.8
409	1	33.74	2	67.5	1.7	23.36	0	83	0	2	69	57	62	9		17	-13.5		45	-0.3	0.94	0.24	-0.41		-0.35	-0.79		1.31
410	1	32.62	2	68.7	1.86	19.86	0	80.17	0	4	103	51	33	15		39	-1	41.2		0.46	0.51	-1.03	0.82		1.37	0.41	2.13
411	1	30.04	2	72.2	1.84	21.33	0	80.5	0	4	120	56	66	15		15.5	7.75	34.7		0.84	0.87	0.42	0.82		-0.47	1.25	1.3
412	1	31.24	2	73.5	1.79	23.07	0	90.5	0	4	74	64	80	12		38	-4	46.94		-0.18	1.45	1.03	0.2		1.29	0.12	2.85
413	1	33.92	2	70.4	1.84	20.79	0	80	0	4	138	66	62	16		18	6.5	37.07		1.24	1.59	0.24	1.02		-0.27	1.13	1.6
414	1	33.38	2	88.8	1.85	25.95	1	95.33	1	4	77	56	70	19		24	11.5		44.5	-0.12	0.87	0.59	1.63		0.2	1.62		1.26
415	1	31.3	2	87	1.84	25.7	1	98.75	1	3	89	64	86	13		25	-4.5	33.87		0.15	1.45	1.29	0.41		0.27	0.08	1.2
416	1	31.27	2	93.6	1.83	27.95	1	103.5	2	4	60	58	74	14		20	0	28.11		-0.5	1.01	0.77	0.61		-0.12	0.51	0.47
417	1	34.27	2	82	1.75	26.78	1	93.75	0	3	60	59	59	10		12	-2.25		38.5	-0.5	1.09	0.11	-0.2		-0.74	0.29		0.68
418	1	30.4	2	85.5	1.76	27.6	1	91	0	2	120	58	74	10		22	10	37.4		0.84	1.01	0.77	-0.2		0.04	1.47	1.65
419	1	32.38	2	83	1.89	23.24	0	90	0	4	95	52	63	10		13	-7.5	33.4		0.28	0.58	0.29	-0.2		-0.66	-0.21	1.14
420	1	30.67	2	95.6	1.73	31.94	2	100.5	1	2	41	68	71	8		8	-5.25		43	-0.92	1.73	0.64	-0.61		-1.05	0		1.12
421	1	34.53	2	90.5	1.76	29.15	1	100	1	2	34	60	60	14		17	2		45	-1.08	1.16	0.15	0.61		-0.35	0.7		1.31
422	1	30.06	2	99	1.8	30.56	2	97	1	3	57	62	47	13		18	-7.75		46	-0.56	1.3	-0.42	0.41		-0.27	-0.24		1.41
423	1	30.47	2	101.8	1.9	28.2	1	102.5	2	2	60	63	67	7		11	-6		26	-0.5	1.37	0.46	-0.82		-0.82	-0.07		-0.53
424	1	32.33	2	114.2	1.84	33.92	2	104.67	2	2	40	66	66	7		10	-25.5		28	-0.94	1.59	0.42	-0.82		-0.9	-1.94		-0.34
425	1	34.81	2	107	1.74	35.34	2	112	2	1	101	50	63		15	17	3	23.8	39	0.42	0.44	0.29		1.56	-0.35	0.8	-0.08	0.73
426	1	39.6	2	93	1.82	28.08	1	96.33	1	2	107	64	100	11		39	-14	31.94	50.5	0.55	1.45	1.91	0		1.37	-0.84	0.95	1.84
427	1	39.44	2	136.5	1.79	42.6	2	134	2	3	43	100	54	11		4	-34		41	-0.88	4.04	-0.11	0		-1.37	-2.76		0.92
428	1	39.47	2	87.2	1.92	23.65	0	91.5	0	2	90	54	47	12		-2	7		41	0.17	0.73	-0.42	0.2		-1.84	1.18		0.92
429	1	37.47	2	78.4	1.84	23.16	0	83	0	4	96	68	62	19		-2.5	-5		46	0.31	1.73	0.24	1.63		-1.88	0.03		1.41
430	1	39.31	2	84.7	1.87	24.22	0	84.33	0	4	120	58	65	13		37	-8		32	0.84	1.01	0.37	0.41		1.21	-0.26		0.05
431	1	36.28	2	76	1.78	23.99	0	89	0	4	128	53	77	11		19	4.5	27.8	43.5	1.02	0.65	0.9	0		-0.2	0.94	0.43	1.17
432	1	37.04	2	90	1.82	27.17	1	90	0	2	117	68	63	10		10	-10.5	34.5		0.77	1.73	0.29	-0.2		-0.9	-0.5	1.28
433	1	39.07	2	77	1.78	24.3	0	92	0	2	107	55	70	12		7	0	25.6	37	0.55	0.8	0.59	0.2		-1.13	0.51	0.15	0.53
434	1	37.09	2	69.6	1.8	21.6	0	73.75	0	3	127	52	82	31		25	3.85			1	0.58	1.12	4.08		0.27	0.88
435	1	39.04	2	68.6	1.72	23.19	0	78.5	0	3	64	50	79	25		23	-12			-0.41	0.44	0.99	2.86		0.12	-0.64
436	1	37.2	2	70.2	1.77	22.53	0	82.5	0		78	54	66	14		-13	8.5		44	-0.1	0.73	0.42	0.61		-2.7	1.33		1.21
437	1	39.09	2	78.9	1.85	23.05	0	91	0	2	73	54	66	13		32	-9	32.9	44	-0.21	0.73	0.42	0.41		0.82	-0.36	1.08	1.21
438	1	36	2	89.4	1.74	29.53	1	57.33	0	3	66	64	66	7		16	-6.5	40	48	-0.36	1.45	0.42	-0.82		-0.43	-0.12	1.97	1.6
439	1	37.21	2	78	1.85	22.79	0	85	0	4	61	68	68	16		34	-9.75	38.7	51	-0.47	1.73	0.5	1.02		0.98	-0.43	1.81	1.89
440	1	37.96	2	79	1.8	24.38	0	90	0	4	109	52	70	17		22	-16	38.8	49	0.59	0.58	0.59	1.22		0.04	-1.03	1.82	1.7
441	1	39.47	2	75.4	1.81	23.02	0	84	0	4	53	48	62			33	3		34	-0.65	0.29	0.24			0.9	0.8		0.24
442	1	35.87	2	78.5	1.75	25.63	1	89.83	0	2	205	56	64	14		37	-3.75	33.19	42	2.73	0.87	0.33	0.61		1.21	0.15	1.11	1.02
443	1	37.02	2	98.6	1.97	25.41	1	91.83	0	4	63	64	65	16		7	-4.5	39.27	48	-0.43	1.45	0.37	1.02		-1.13	0.08	1.88	1.6
444	1	35.39	2	64.5	1.76	20.94	0	81.17	0	3	107	55	80	9		34	10		41	0.55	0.8	1.03	-0.41		0.98	1.47		0.92
445	1	35.95	2	86	1.78	27.14	1	93.33	0	2	55	49	63	13		30	1			-0.61	0.37	0.29	0.41		0.66	0.61
446	1	36.7	2	85	1.82	25.66	1	90	0	2	95	72	70	20		35	3		47	0.28	2.02	0.59	1.84		1.05	0.8		1.5
447	1	36.79	2	75.3	1.79	23.5	0	78	0	4	125	48	64	22		31	-18		51.5	0.95	0.29	0.33	2.24		0.74	-1.22		1.94
448	1	37.41	2	89	1.91	24.45	0	86	0	4	54	64	61	17		37	20.5		61.5	-0.63	1.45	0.2	1.22		1.21	2.48		2.91
449	1	37.48	2	74.1	1.74	24.62	0	85	0	3	87	74	65	15		37	6.5		48	0.1	2.17	0.37	0.82		1.21	1.13		1.6
450	1	39.66	2	83.7	1.77	26.72	1	90.33	0	2	60	54	65			49	-4		38	-0.5	0.73	0.37			2.15	0.12		0.63
451	1	36.65	2	72	1.8	22.22	0	75.17	0	3	158	71	25	16		30	7	44.5		1.69	1.95	-1.38	1.02		0.66	1.18	2.54
452	1	35.41	2	75	1.81	22.89	0	83.5	0	4	42	59	68	21		26	-3	41.7		-0.9	1.09	0.5	2.04		0.35	0.22	2.19
453	1	35.97	2	66	1.8	20.37	0	79	0	3	90	42	74	10		9	0.5	30		0.17	-0.14	0.77	-0.2		-0.98	0.56	0.71
454	1	38.44	2	80	1.78	25.25	1	92	0	2	101	59	65	15		14	1.5	36.08		0.42	1.09	0.37	0.82		-0.59	0.65	1.48
455	1	39.67	2	95	1.95	24.98	0	90.67	0	4	62	68	88	12		22	-17	27.9		-0.45	1.73	1.38	0.2		0.04	-1.13	0.44
456	1	37.63	2	87	1.79	27.15	1	99	1	2	58	57	67	14		-11	-4		48	-0.54	0.94	0.46	0.61		-2.54	0.12		1.6
457	1	35.15	2	95.4	1.73	31.88	2	104.25	2	2	72	54	67.5	14		5.5	-3.5		38	-0.23	0.73	0.48	0.61		-1.25	0.17		0.63
458	1	35.45	2	104.7	1.92	28.4	1	105.17	2	4	72	46	66	5		0	-6.5	22.8	40	-0.23	0.15	0.42	-1.22		-1.68	-0.12	-0.2	0.83
459	1	38.48	2	94	1.77	30	2	103.83	2	2	72	54	64	20		20.5	-19.5	33.5	45	-0.23	0.73	0.33	1.84		-0.08	-1.37	1.15	1.31
460	1	38.79	2	99.3	1.89	27.8	1	109.17	2	2	61	52	65	15		32	6	28.5	45	-0.47	0.58	0.37	0.82		0.82	1.09	0.52	1.31
461	1	35.9	2	94	1.74	31.05	2	107.5	2	3	122	51	120	13		15	-11	36.28	38.5	0.88	0.51	2.79	0.41		-0.51	-0.55	1.5	0.68
462	1	38.02	2	86.5	1.79	27	1	93.17	0		109	49	75	11		21	-19.5	28.34	37	0.59	0.37	0.81	0		-0.04	-1.37	0.5	0.53
463	1	39.85	2	84.3	1.82	25.45	1	90	0	2	95	60	48	18		19	-5.25		28	0.28	1.16	-0.37	1.43		-0.2	0		-0.34
464	1	38.35	2	83.5	1.84	24.66	0	81.5	0	4	110	64	85	13		17	0	32.4		0.62	1.45	1.25	0.41		-0.35	0.51	1.01
465	1	38.02	2	95.5	1.84	28.21	1	100.67	1	2	52	63	25	8		22.5	-7		48	-0.67	1.37	-1.38	-0.61		0.08	-0.16		1.6
466	1	35.9	2	112	1.87	32.03	2	100.17	1	4	63	82	63	15		15.5	-6.25		52	-0.43	2.74	0.29	0.82		-0.47	-0.09		1.99
467	1	38.39	2	94	1.84	27.76	1	103.33	2	2	83	59	64	9		34	3.5		38	0.02	1.09	0.33	-0.41		0.98	0.85		0.63
468	1	36.08	2	97	1.83	28.96	1	107	2		120	70	55	15		15	-13	37.8		0.84	1.88	-0.07	0.82		-0.51	-0.74	1.7
111	0	47.29	3	71.5	1.72	24.17	0	79	0	2		28	67		14	18.5	3.75				-1.14	0.46		1.33	-0.23	0.87
112	0	44.3	3	62.6	1.65	22.99	0	82	1	3	91	36	69	9		5	6		32	0.19	-0.57	0.55	-0.41		-1.29	1.09		0.05
113	0	40.71	3	81	1.69	28.36	1	84.33	1	2	80	30	72	12		20	7			-0.05	-1	0.68	0.2		-0.12	1.18
114	0	44.01	3	72.3	1.63	27.21	1	86.5	1	3	65	36	65		20	29	-3.25			-0.39	-0.57	0.37		2.67	0.59	0.2
115	0	42.64	3	117	1.68	41.7	2	111.17	2	3	36	30	63		10	20.5	-7.5			-1.03	-1	0.29		0.44	-0.08	-0.21
116	0	47.05	3	75.5	1.65	27.8	1	96	2	2	23	32	36		9	11	-18.5		20	-1.32	-0.86	-0.9		0.22	-0.82	-1.27		-1.12
117	0	47.45	3	107.1	1.7	37.06	2	112.83	2	1	40	28	25		4	19	-2.5			-0.94	-1.14	-1.38		-0.89	-0.2	0.27
118	0	47.84	3	121.1	1.69	42.4	2	117.83	2	3	17.6	33	46		12	21	-20.5			-1.44	-0.78	-0.46		0.89	-0.04	-1.46
119	0	43.27	3	129.9	1.79	40.54	2	113	2	3	61	36	18		5	26	-38	11.9	13	-0.47	-0.57	-1.69		-0.67	0.35	-3.14	-1.58	-1.8
120	0	46.62	3	68.6	1.79	21.41	0	79.58	0	1	69	30	58	4		18	1.5		19	-0.3	-1	0.07	-1.43		-0.27	0.65		-1.21
121	0	48.47	3	52.6	1.67	18.86	0	77.75	0	4	240	30	23		10	24	-4.5		27	3.51	-1	-1.47		0.44	0.2	0.08		-0.44
122	0	42.59	3	55.5	1.67	19.9	0	74	0	4	120	42	72	8		21	2.5		34	0.84	-0.14	0.68	-0.61		-0.04	0.75		0.24
123	0	44.9	3	64.1	1.73	21.42	0	76	0	4	35	39	77		8	15	-3.75	22	28.5	-1.05	-0.35	0.9		0	-0.51	0.15	-0.3	-0.29
124	0	45.12	3	64	1.71	21.89	0	72	0	3	70	29	65		12	4	4	17.9	28	-0.27	-1.07	0.37		0.89	-1.37	0.89	-0.82	-0.34
125	0	45.39	3	64.7	1.64	24.06	0	77	0	3	82	33	65	8		22	3.25		31.5	-0.01	-0.78	0.37	-0.61		0.04	0.82		0
126	0	45.61	3	65	1.67	23.31	0	70	0	1	120	30	65		6	4	2	17.3	28	0.84	-1	0.37		-0.44	-1.37	0.7	-0.9	-0.34
127	0	47.47	3	65.5	1.78	20.67	0	68	0	4	100	37	69	4		6.5	5	18.8	40	0.39	-0.5	0.55	-1.43		-1.17	0.99	-0.71	0.83
128	0	48.35	3	60.3	1.73	20.15	0	70	0	3	138	31	65	9		-1	-9		8.5	1.24	-0.93	0.37	-0.41		-1.76	-0.36		-2.23
129	0	40.13	3	81.4	1.71	27.84	1	71.25	0	4	120	36	79	15		50	17			0.84	-0.57	0.99	0.82		2.23	2.14
130	0	45.36	3	67.8	1.71	23.19	0	66.17	0	4	120	36	68		18	25	-0.25			0.84	-0.57	0.5		2.22	0.27	0.49
131	0	49.13	3	62.1	1.66	22.45	0	64.75	0	2	120	31	69		20	28	-7.5			0.84	-0.93	0.55		2.67	0.51	-0.21
132	0	46.48	3	64.7	1.69	22.68	0	71.2	0	4	156	30	25		9	5	4		27	1.64	-1	-1.38		0.22	-1.29	0.89		-0.44
133	0	40.51	3	61.3	1.61	23.8	0	74.5	0	4	154	30	63		14	12	6.5		28	1.6	-1	0.29		1.33	-0.74	1.13		-0.34
134	0	42.72	3	55.4	1.63	20.96	0	71	0	3	56	28	64	9		-5	-2		23	-0.59	-1.14	0.33	-0.41		-2.07	0.32		-0.83
135	0	46.92	3	59.6	1.7	20.62	0	75.17	0	4	66	21	26			13		12.4		-0.36	-1.65	-1.34			-0.66		-1.52
136	0	47.73	3	56	1.58	22.43	0	78.33	0	3	71	30	42		11	36	-3		31	-0.25	-1	-0.64		0.67	1.13	0.22		-0.05
137	0	45.99	3	56.9	1.69	19.92	0	73.83	0	2	181	26	67	8		35	5	24.4	25	2.2	-1.29	0.46	-0.61		1.05	0.99	0	-0.63
138	0	48.98	3	60	1.66	21.77	0	78	0	4	86	30	50	3		21	0	22.7	27	0.08	-1	-0.29	-1.63		-0.04	0.51	-0.22	-0.44
139	0	43.25	3	57.5	1.7	19.9	0	74.67	0	1	106	45	61	0		-6	-9.5	31.8	33	0.53	0.08	0.2	-2.24		-2.15	-0.4	0.94	0.15
140	0	46.84	3	57	1.58	22.83	0	72.07	0	3	40	29	63.7	0	0	28.9	9.5	22	28.5	-0.94	-1.07	0.32	-2.24	-1.78	0.58	1.42	-0.3	-0.29
141	0	47.32	3	51.8	1.68	18.35	0	64.83	0	2	47.6	34	85		0	22	4.25	22.1	27.5	-0.77	-0.71	1.25		-1.78	0.04	0.92	-0.29	-0.39
142	0	47.77	3	51	1.65	18.73	0	72.75	0	3	128	32	66	1		29	13.5	23	29	1.02	-0.86	0.42	-2.04		0.59	1.81	-0.18	-0.24
143	0	49.04	3	69.3	1.7	23.98	0	75.67	0	3	41.5	38	62	1		28.5	7	26.6	25.5	-0.91	-0.42	0.24	-2.04		0.55	1.18	0.28	-0.58
144	0	49.18	3	52.4	1.58	20.99	0	72.5	0	2	70	28	65		9	40	-1.75	21.5	22	-0.27	-1.14	0.37		0.22	1.45	0.34	-0.37	-0.92
145	0	41.14	3	63.3	1.6	24.73	0	72.5	0	4	165	32	88	9		39	0.5	23.81	32	1.84	-0.86	1.38	-0.41		1.37	0.56	-0.07	0.05
146	0	44.17	3	58.7	1.63	22.09	0	73.67	0	3	145	35	80		12	25	14	25.82	35	1.4	-0.64	1.03		0.89	0.27	1.86	0.18	0.34
147	0	49.93	3	51.5	1.56	21.16	0	65.5	0	2	9	26	68		7	32	3	15.16	12	-1.63	-1.29	0.5		-0.22	0.82	0.8	-1.17	-1.89
148	0	48.79	3	56.1	1.57	22.76	0	76	0	2	95	28		7		32.5	0.75		23	0.28	-1.14		-0.82		0.86	0.58		-0.83
149	0	40.95	3	61	1.58	24.59	0	76	0	2	94	35	37	11			-1		41	0.26	-0.64	-0.86	0			0.41		0.92
150	0	47.65	3	50.5	1.57	20.49	0	67.33	0	4		28	35			28	0.5		22		-1.14	-0.94			0.51	0.56		-0.92
151	0	40.65	3	60.7	1.58	24.47	0	74.83	0	4	94	42	66	8		39	0		36	0.26	-0.14	0.42	-0.61		1.37	0.51		0.44
152	0	41.74	3	72	1.77	22.98	0	75.67	0	2	60	39	64	9		30	-2.5		35	-0.5	-0.35	0.33	-0.41		0.66	0.27		0.34
153	0	44.32	3	62	1.68	21.97	0	71	0	2	106	37	67	2		40	-0.5		23	0.53	-0.5	0.46	-1.84		1.45	0.46		-0.83
154	0	44.55	3	60.4	1.68	21.53	0	77	0	1	132	49	64	7		45	7		32	1.11	0.37	0.33	-0.82		1.84	1.18		0.05
155	0	47.69	3	65.2	1.62	24.84	0	75.67	0	3	133	32	69		11	26	-8		18	1.13	-0.86	0.55		0.67	0.35	-0.26		-1.31
156	0	43.53	3	57	1.68	20.2	0	76	0		240	41	68	10		34.5	7.25	27.6		3.51	-0.21	0.5	-0.2		1.02	1.21	0.41
157	0	49.65	3	52.3	1.63	19.81	0	79.5	0	4	120	32	73	17		31	11.5	24.8		0.84	-0.86	0.72	1.22		0.74	1.62	0.05
158	0	41.52	3	81.7	1.79	25.5	1	84.17	1	3	94	42	68	12		39	2.5		31	0.26	-0.14	0.5	0.2		1.37	0.75		-0.05
159	0	48.62	3	61.7	1.7	21.35	0	85	1	3	19	29	67		7	18	-0.5		21.5	-1.41	-1.07	0.46		-0.22	-0.27	0.46		-0.97
160	0	49.61	3	69.5	1.7	24.05	0	82	1	3	62	37	39		6	-7.5	0		21.5	-0.45	-0.5	-0.77		-0.44	-2.27	0.51		-0.97
161	0	42.23	3	64	1.57	25.96	1	81	1	2	65	32	66.5	7		-14	-1	17.4	30	-0.39	-0.86	0.44	-0.82		-2.77	0.41	-0.89	-0.15
162	0	45.08	3	63.4	1.66	23.01	0	81	1	2	150	25	64	12		22	6.5	16.6	27	1.51	-1.36	0.33	0.2		0.04	1.13	-0.99	-0.44
163	0	42.34	3	71.9	1.66	26.09	1	87.33	1	3	61	21	61	11		33	-0.5			-0.47	-1.65	0.2	0		0.9	0.46
164	0	48.91	3	75.2	1.67	26.95	1	86.5	1	2	63	23	19		0	-4	-12.5		26	-0.43	-1.5	-1.64		-1.78	-1.99	-0.69		-0.53
165	0	44.75	3	66.2	1.68	23.44	0	81	1	4	41	27	77	9		-12	-3		26	-0.92	-1.22	0.9	-0.41		-2.62	0.22		-0.53
166	0	42.64	3	72.3	1.68	25.77	1	87.17	1	4	27.7	28	60.2		5	20		19.9	29.5	-1.22	-1.14	0.16		-0.67	-0.12		-0.57	-0.19
167	0	49.3	3	60.9	1.59	24.09	0	86.17	1	1	110	26	66		3	36.5	0		17.5	0.62	-1.29	0.42		-1.11	1.17	0.51		-1.36
168	0	46.17	3	65	1.7	22.49	0	82	1	2	53.4	25	61.5		3	18	0	23	27.3	-0.64	-1.36	0.22		-1.11	-0.27	0.51	-0.18	-0.41
169	0	44.55	3	59.2	1.64	22.01	0	81.67	1	2	65	32	42		15	15	-2.5	19.04	30	-0.39	-0.86	-0.64		1.56	-0.51	0.27	-0.68	-0.15
170	0	41.17	3	79.3	1.75	25.89	1	84.93	1	2	78	37	67		15	34.5	6	18.54	29.3	-0.1	-0.5	0.46		1.56	1.02	1.09	-0.74	-0.21
171	0	46.88	3	54	1.64	20.08	0	82.23	1	2	131	28	63	9		38	12	20.2	28	1.08	-1.14	0.29	-0.41		1.29	1.66	-0.53	-0.34
172	0	45.08	3	58.2	1.6	22.73	0	82.5	1	3	61	29	68	6		26	-0.5		26.5	-0.47	-1.07	0.5	-1.02		0.35	0.46		-0.49
173	0	46.07	3	86	1.75	28.08	1	86.17	1	3	75	42	74	8		33	-1		27	-0.16	-0.14	0.77	-0.61		0.9	0.41		-0.44
174	0	42.13	3	63	1.68	22.32	0	81	1	4	100	32	72		11	30	-7	24.89		0.39	-0.86	0.68		0.67	0.66	-0.16	0.06
175	0	47.02	3	67.5	1.78	21.3	0	86	1	4	78	34	62.5		9	21.5	-12.75	23.39		-0.1	-0.71	0.26		0.22	0	-0.72	-0.13
176	0	47.27	3	75.8	1.73	25.33	1	94.5	2	2	86	38	63		12	36	-2.5		27	0.08	-0.42	0.29		0.89	1.13	0.27		-0.44
177	0	43.62	3	77	1.77	24.58	0	93	2	4	93	40	55	13		8	-1	18.9	28	0.24	-0.28	-0.07	0.41		-1.05	0.41	-0.7	-0.34
178	0	43.96	3	73.6	1.65	27.03	1	92	2	2	63	36	51		7	19	3	17.9	23	-0.43	-0.57	-0.24		-0.22	-0.2	0.8	-0.82	-0.83
179	0	44.75	3	78.5	1.69	27.49	1	100	2	2	63	30	68		10	14	-12.5	17.9	23.5	-0.43	-1	0.5		0.44	-0.59	-0.69	-0.82	-0.78
180	0	47.2	3	84.8	1.76	27.38	1	88	2	2	120	40	67		10	23	-7	15.3	26	0.84	-0.28	0.46		0.44	0.12	-0.16	-1.15	-0.53
181	0	49.62	3	66	1.7	22.84	0	89	2	2	92	35	67		10	40	9.5	18	26	0.22	-0.64	0.46		0.44	1.45	1.42	-0.81	-0.53
182	0	44.89	3	78.2	1.66	28.45	1	90.25	2	3	23	32	22	10		-4	-10		28	-1.32	-0.86	-1.51	-0.2		-1.99	-0.45		-0.34
183	0	45.96	3	75.1	1.71	25.83	1	98	2	2		32	13		5	10	-6		17		-0.86	-1.91		-0.67	-0.9	-0.07		-1.41
184	0	41.21	3	80.3	1.62	30.6	2	93	2	3	57	35	28	5		36.5		17.9	29	-0.56	-0.64	-1.25	-1.22		1.17		-0.82	-0.24
185	0	42.03	3	77.3	1.65	28.39	1	93.5	2	4	55	36	65	6		41	-1.5	17.5	29.5	-0.61	-0.57	0.37	-1.02		1.52	0.37	-0.87	-0.19
186	0	40.1	3	93	1.79	29.03	1	100	2	3	40	33	63.5		11	21.5	4	16.77	30	-0.94	-0.78	0.31		0.67	0	0.89	-0.97	-0.15
187	0	40.56	3	78.4	1.62	29.87	1	95.17	2	4	77	30	69		15	13	-8	21.12	26	-0.12	-1	0.55		1.56	-0.66	-0.26	-0.42	-0.53
188	0	40.73	3	74	1.65	27.18	1	97.4	2	3	128	38	88	14		23.5	0.25	19.55	30.5	1.02	-0.42	1.38	0.61		0.16	0.53	-0.61	-0.1
189	0	45.08	3	75.4	1.66	27.36	1	92.67	2	2	89	40	68		13	30.5	-15.75	20.98	21	0.15	-0.28	0.5		1.11	0.7	-1	-0.43	-1.02
190	0	40.75	3	82	1.79	25.59	1	88.5	2	2	120	42	61		10	37	1.5	17.73		0.84	-0.14	0.2		0.44	1.21	0.65	-0.84
191	0	45.35	3	80	1.73	26.89	1	92.5	2	4	120	36	63		11	14	4.5	17.83		0.84	-0.57	0.29		0.67	-0.59	0.94	-0.83
192	0	47.69	3	71.5	1.73	23.83	0	92	2	4	98	38	67	12		25	2.75	24.5		0.35	-0.42	0.46	0.2		0.27	0.77	0.01
193	0	43.45	3	72.5	1.76	23.43	0	74.67	0	2	60	15	36	4		15	7		9	-0.5	-2.08	-0.9	-1.43		-0.51	1.18		-2.18
194	0	45.44	3	66	1.59	26.11	1	82	1	2	63	28	64		5	6	-11	12.3	18	-0.43	-1.14	0.33		-0.67	-1.21	-0.55	-1.53	-1.31
195	0	45.32	3	74.3	1.67	26.64	1	82.33	1	3	114	23	45		0	35.5	-11	18.5	27	0.71	-1.5	-0.5		-1.78	1.09	-0.55	-0.75	-0.44
196	0	46.61	3	69	1.68	24.45	0	81.25	1	2	109	32	70	8		11	4.5	19.2	29	0.59	-0.86	0.59	-0.61		-0.82	0.94	-0.66	-0.24
197	0	46.88	3	73.8	1.62	28.12	1	81	1	3	58	31	63		16	36	-0.5	21.34	34	-0.54	-0.93	0.29		1.78	1.13	0.46	-0.39	0.24
198	0	47.22	3	79	1.72	26.7	1	85.67	1	2	75	28	67		8	21	-8.5	17.15	21	-0.16	-1.14	0.46		0	-0.04	-0.31	-0.92	-1.02
199	0	45.25	3	92.9	1.71	31.77	2	102.67	2	4	67	34	35	7		21	-5		23	-0.34	-0.71	-0.94	-0.82		-0.04	0.03		-0.83
200	0	46.61	3	95.8	1.71	32.95	2	111.5	2	2	37	33	39		7	11.5	-12.5		18	-1.01	-0.78	-0.77		-0.22	-0.78	-0.69		-1.31
201	0	45.45	3	86.9	1.64	32.31	2	96.95	2	2	60	34	61		8	31.5	-6.5		20	-0.5	-0.71	0.2		0	0.78	-0.12		-1.12
202	0	46.88	3	74.9	1.64	27.85	1	92	2	4	67	34	70	6		43	4.5		29.5	-0.34	-0.71	0.59	-1.02		1.68	0.94		-0.19
203	0	42.65	3	92.1	1.6	35.93	2	109	2	2	65	36	39	8		7	-12		18.5	-0.39	-0.57	-0.77	-0.61		-1.13	-0.64		-1.26
204	0	46.32	3	81	1.68	28.7	1	92	2	2	26	32	56		0	19.5	-5.5	17.7	25.5	-1.25	-0.86	-0.02		-1.78	-0.16	-0.02	-0.85	-0.58
205	0	47.42	3	94.1	1.73	31.44	2	99	2	2	35	34	59	0	0	19	-14	17.6	21	-1.05	-0.71	0.11	-2.24	-1.78	-0.2	-0.84	-0.86	-1.02
206	0	49.19	3	92	1.73	30.74	2	97.5	2	2	30	41	32			25	-9		18	-1.16	-0.21	-1.07			0.27	-0.36		-1.31
207	0	48.93	3	103.7	1.72	35.05	2	103.77	2	4	43	33	12		10	30	-12	14.68	23	-0.88	-0.78	-1.95		0.44	0.66	-0.64	-1.23	-0.83
208	0	42.19	3	109.7	1.66	39.81	2	107.83	2	4	54	38	105		15	29.5	-13	24.62	25.5	-0.63	-0.42	2.13		1.56	0.63	-0.74	0.03	-0.58
209	0	43.85	3	88	1.72	29.75	1	95.17	2	2	95	36	66		10	27	-8.5	16.73	23	0.28	-0.57	0.42		0.44	0.43	-0.31	-0.97	-0.83
210	0	48.56	3	88.5	1.66	32.12	2	107.67	2	2	81	30	64	9		27	-32	14.18	24	-0.03	-1	0.33	-0.41		0.43	-2.57	-1.29	-0.73
211	0	47.88	3	95.5	1.69	33.44	2	108	2	4	110	45	60.5	7		27.5	-12.75		31	0.62	0.08	0.18	-0.82		0.47	-0.72		-0.05
212	0	48.78	3	79.8	1.59	31.57	2	97	2	3	70	36	63		8	24	-2.5		20	-0.27	-0.57	0.29		0	0.2	0.27		-1.12
213	0	41.96	3	79	1.63	29.73	1	91.5	2	1	62	35	63	10		22	-11	18.1		-0.45	-0.64	0.29	-0.2		0.04	-0.55	-0.8
214	0	45.48	3	101.6	1.81	31.08	2	108	2	4	42	42	63		6	22	-2.5	13.3		-0.9	-0.14	0.29		-0.44	0.04	0.27	-1.41
469	1	41.78	3	64.2	1.76	20.84	0	76.17	0	4	120	45	82	24		19	-5.75			0.84	0.08	1.12	2.65		-0.2	-0.04
470	1	42.29	3	96.3	1.84	28.6	1	93.33	0	3	78	54	72	15		1	-8.5			-0.1	0.73	0.68	0.82		-1.6	-0.31
471	1	43.91	3	84.3	1.84	24.98	0	81.5	0	3	60	61	73	14		37	-2.25			-0.5	1.23	0.72	0.61		1.21	0.29
472	1	45.8	3	67.2	1.71	22.98	0	78.17	0	4	77	45	72	27		30	7.5			-0.12	0.08	0.68	3.27		0.66	1.23
473	1	49.85	3	80.8	1.75	26.38	1	89	0	2	95	49	64	20		26	-4.5			0.28	0.37	0.33	1.84		0.35	0.08
474	1	40.87	3	64.1	1.76	20.69	0	75.33	0	4						30	9		39						0.66	1.38		0.73
475	1	42.52	3	76	1.79	23.72	0	89	0	4	120	58	65	15		35	-11.5	40.75		0.84	1.01	0.37	0.82		1.05	-0.6	2.07
476	1	40.06	3	92.7	1.83	27.8	1	101.17	1	4	60	45	66.8	15		34	-4.5			-0.5	0.08	0.45	0.82		0.98	0.08
477	1	41.34	3	107.1	1.91	29.36	1	94.33	1	4	64	60	65	22		35	2.5			-0.41	1.16	0.37	2.24		1.05	0.75
478	1	48.87	3	86	1.82	25.96	1	96.33	1	4	53	56	64	15		36	-12.5	29.61	39	-0.65	0.87	0.33	0.82		1.13	-0.69	0.66	0.73
479	1	49.74	3	81	1.68	28.7	1	97	1	2	50	44	3	10		24	-20.5		39	-0.72	0.01	-2.35	-0.2		0.2	-1.46		0.73
480	1	42.64	3	105.3	1.81	32.14	2	107.93	2	3	69	58	69	11		34	-16.5	29.03	38	-0.3	1.01	0.55	0		0.98	-1.08	0.59	0.63
481	1	45.22	3	76.2	1.8	23.52	0	88.5	0	4	68	64	16	17		16	-5.25		52.5	-0.32	1.45	-1.78	1.22		-0.43	0		2.04
482	1	48.19	3	85.7	1.88	24.25	0	92.5	0	1	47	54	37	8		1	-16		35	-0.79	0.73	-0.86	-0.61		-1.6	-1.03		0.34
483	1	41.04	3	86.2	1.87	24.65	0	91	0	3	56	70	64	10		10	8		39	-0.59	1.88	0.33	-0.2		-0.9	1.28		0.73
484	1	41.25	3	81.7	1.83	24.53	0	81.75	0	3	60	48	62	22		32	-6.75		46	-0.5	0.29	0.24	2.24		0.82	-0.14		1.41
485	1	41.68	3	70.2	1.72	23.87	0	86.75	0	4	30	58	66	16		18.5	5.5		46.5	-1.16	1.01	0.42	1.02		-0.23	1.04		1.46
486	1	43.93	3	75.1	1.69	26.29	1	91.25	0	2	53	56	76	9		30.5	-8.5		44	-0.65	0.87	0.86	-0.41		0.7	-0.31		1.21
487	1	46.33	3	79.7	1.8	24.6	0	92	0	3	203	73	76	16		43	2.5		45	2.69	2.09	0.86	1.02		1.68	0.75		1.31
488	1	41.02	3	84.4	1.95	22.2	0	90	0	4	150	50	71	19		15	2	32.6		1.51	0.44	0.64	1.63		-0.51	0.7	1.04
489	1	41.52	3	92	1.84	27.17	1	93	0	4	65	58	63	19		3	9	21.6	40	-0.39	1.01	0.29	1.63		-1.45	1.38	-0.35	0.83
490	1	42.56	3	76.9	1.82	23.22	0	91	0	2	40	62	65.6			6	-7.5			-0.94	1.3	0.4			-1.21	-0.21
491	1	44.78	3	78.2	1.84	23.1	0	76	0	3	72	56	83	13		8	-1.5	41.9		-0.23	0.87	1.16	0.41		-1.05	0.37	2.22
492	1	46.93	3	67	1.73	22.39	0	85	0	4	135	57	85	18		18	8	37.8	51.5	1.17	0.94	1.25	1.43		-0.27	1.28	1.7	1.94
493	1	45.11	3	84.8	1.72	28.83	1	86.67	0	3	67	46	66	16		26	-0.5			-0.34	0.15	0.42	1.02		0.35	0.46
494	1	46.64	3	94	1.84	27.86	1	92.75	0	3	90	60	70	16		32	6.25			0.17	1.16	0.59	1.02		0.82	1.11
495	1	45.14	3	76.3	1.81	23.4	0	89	0	2	80	42	15	9		-11	-3.5		34	-0.05	-0.14	-1.82	-0.41		-2.54	0.17		0.24
496	1	46.01	3	71.6	1.71	24.57	0	82.75	0	4	47	46	67	14		3	-29		38	-0.79	0.15	0.46	0.61		-1.45	-2.28		0.63
497	1	48.8	3	77.7	1.78	24.51	0	85.45	0	2	38	56	65	16		-11	-15.5		48	-0.99	0.87	0.37	1.02		-2.54	-0.98		1.6
498	1	41.72	3	87.7	1.88	24.81	0	93.83	0	2	60	53	68	7		3	-29.5	23.7	28.5	-0.5	0.65	0.5	-0.82		-1.45	-2.33	-0.09	-0.29
499	1	42.44	3	69.5	1.73	23.36	0	84.5	0	4	125	54	71	15		27	2	33.6	54.5	0.95	0.73	0.64	0.82		0.43	0.7	1.16	2.23
500	1	44.91	3	67.4	1.74	22.26	0	81.5	0	2		50	68	18		18	-6.5		40.5		0.44	0.5	1.43		-0.27	-0.12		0.87
501	1	44.94	3	77.2	1.72	26.1	1	93.17	0	2	97	54	67	14		11	-10	32.5	43	0.33	0.73	0.46	0.61		-0.82	-0.45	1.03	1.12
502	1	48.36	3	77.6	1.79	24.22	0	91	0	2	119	42	62.4	19		31		34.7	50.5	0.82	-0.14	0.26	1.63		0.74		1.3	1.84
503	1	44.28	3	79	1.8	24.38	0	93.43	0	2	11.2	55	2	1		10	-21.75	25.5	35	-1.58	0.8	-2.39	-2.04		-0.9	-1.58	0.14	0.34
504	1	46.63	3	80	1.84	23.63	0	84	0	2	56	56	20	12		34	-5	30.5	41	-0.59	0.87	-1.6	0.2		0.98	0.03	0.77	0.92
505	1	42.01	3	74	1.84	21.86	0	82.5	0	1	39	58	65	9		42	-4	27.6	32	-0.96	1.01	0.37	-0.41		1.6	0.12	0.41	0.05
506	1	42.39	3	85	1.86	24.57	0	84.5	0	4	89	68	64	12		25	-4.25	41.4	35.5	0.15	1.73	0.33	0.2		0.27	0.1	2.15	0.39
507	1	43.34	3	83	1.69	29.06	1	92.5	0	3	127	59	65	3		28	-5	31.7	45	1	1.09	0.37	-1.63		0.51	0.03	0.92	1.31
508	1	47.55	3	72.3	1.72	24.44	0	90	0	2	45	50	64	6		14	-0.5		38.5	-0.83	0.44	0.33	-1.02		-0.59	0.46		0.68
509	1	40.79	3	76.5	1.86	22.11	0	83.25	0	4	82	52	64	13		0	-17	27.89	40	-0.01	0.58	0.33	0.41		-1.68	-1.13	0.44	0.83
510	1	44.99	3	60	1.67	21.51	0	84	0	4	184	44	63	16		26	3	31.8	45	2.27	0.01	0.29	1.02		0.35	0.8	0.94	1.31
511	1	45.32	3	80	1.81	24.42	0	91.75	0	4	140	56	67	12		27	-27	30.85	40	1.29	0.87	0.46	0.2		0.43	-2.09	0.82	0.83
512	1	48.79	3	60.5	1.69	21.18	0	80.66	0	1	90	49	55	11		43	-3		16	0.17	0.37	-0.07	0		1.68	0.22		-1.5
513	1	40.38	3	81	1.8	25	1	89.67	0	4	104	58	65	8		26.5	-0.75		41.5	0.48	1.01	0.37	-0.61		0.39	0.44		0.97
514	1	41.48	3	83.6	1.82	25.24	1	86.33	0		63	70	65	15		20	-13.5		46	-0.43	1.88	0.37	0.82		-0.12	-0.79		1.41
515	1	44.3	3	74	1.8	22.94	0	84.33	0	4	120	62	64	13		38	6		39	0.84	1.3	0.33	0.41		1.29	1.09		0.73
516	1	46.97	3	78	1.77	24.9	0	88.67	0	2	77	51	67	7		22	-13.5		28	-0.12	0.51	0.46	-0.82		0.04	-0.79		-0.34
517	1	47.37	3	84.1	1.81	25.81	1	93.67	0	2	55	52	64	14		20	-10.5		45	-0.61	0.58	0.33	0.61		-0.12	-0.5		1.31
518	1	40.33	3	79	1.74	26.24	1	89.67	0	3	126	62	64	16		31	-13.5	38.3		0.97	1.3	0.33	1.02		0.74	-0.79	1.76
519	1	43	3	79.5	1.84	23.48	0	85.33	0	1	120	62	62			19	-2	29.6		0.84	1.3	0.24			-0.2	0.32	0.66
520	1	43.75	3	87.2	1.92	23.65	0	87.5	0	4	150	72	95	22		17	-2.5	39.6		1.51	2.02	1.69	2.24		-0.35	0.27	1.92
521	1	44.4	3	75.5	1.76	24.51	0	91	0	4	60	39	63	12		7	0	21.01		-0.5	-0.35	0.29	0.2		-1.13	0.51	-0.43
522	1	45.59	3	66	1.7	22.84	0	81.25	0	4	240	66	66	17		28	6.5	27.3		3.51	1.59	0.42	1.22		0.51	1.13	0.37
523	1	48.26	3	80.7	1.82	24.36	0	91.5	0	3	150	62	70	16		40	6.5	30.6		1.51	1.3	0.59	1.02		1.45	1.13	0.78
524	1	45.17	3	85.8	1.78	27.08	1	97	1	4	85	56	62	13		36	8.5		35	0.06	0.87	0.24	0.41		1.13	1.33		0.34
525	1	40.73	3	90.7	1.82	27.38	1	100	1	2	81	62	68	12		22	-5	28.4	42	-0.03	1.3	0.5	0.2		0.04	0.03	0.51	1.02
526	1	45.61	3	92.7	1.82	27.99	1	99	1	2	150	56	64.5	12		3	-5	23.6	38.5	1.51	0.87	0.35	0.2		-1.45	0.03	-0.1	0.68
527	1	42.63	3	94.2	1.96	24.52	0	101.17	1	2		48	20	4		15	-22	23.1			0.29	-1.6	-1.43		-0.51	-1.61	-0.16
528	1	43.57	3	81.6	1.75	26.64	1	96	1	2	63	54	32	10		25	-3	23.8	41.5	-0.43	0.73	-1.07	-0.2		0.27	0.22	-0.08	0.97
529	1	40.79	3	85.3	1.76	27.54	1	97	1	2	68	45	69	17		20.5	-11.5	22	36	-0.32	0.08	0.55	1.22		-0.08	-0.6	-0.3	0.44
530	1	45	3	73.8	1.73	24.66	0	97.67	1	2	126	47	114	9		32		20.7	31	0.97	0.22	2.52	-0.41		0.82		-0.47	-0.05
531	1	45.22	3	93.2	1.81	28.45	1	94.5	1	4	60	65	106	8		13.5	-18.5	36	43	-0.5	1.52	2.17	-0.61		-0.63	-1.27	1.47	1.12
532	1	47.28	3	91.2	1.73	30.47	2	95.67	1	4	65	76	66	16		10	-13		50	-0.39	2.31	0.42	1.02		-0.9	-0.74		1.8
533	1	43.44	3	90	1.87	25.88	1	97.5	1	2	90	59	10	12		30	1.5	35		0.17	1.09	-2.04	0.2		0.66	0.65	1.34
534	1	45.26	3	75	1.78	23.8	0	94.33	1	2	78	52	17	8		33	0	29.6		-0.1	0.58	-1.73	-0.61		0.9	0.51	0.66
535	1	41.34	3	86	1.72	29.07	1	97.33	1	3	120	67	61	17		33	-3.5	39.19		0.84	1.66	0.2	1.22		0.9	0.17	1.87
536	1	44.74	3	87	1.8	26.85	1	98.5	1	3	89	62	72	12		15	-23	31.6		0.15	1.3	0.68	0.2		-0.51	-1.7	0.91
537	1	49.75	3	88	1.76	28.41	1	102	2	3		46	26								0.15	-1.34
538	1	43.67	3	97.7	1.76	31.54	2	108.67	2	2		65	66	10		17	-16.5	27.3			1.52	0.42	-0.2		-0.35	-1.08	0.37
539	1	45.99	3	87.2	1.87	24.94	0	91.5	0	3	40	48	62	8		18.5	-6.25		41	-0.94	0.29	0.24	-0.61		-0.23	-0.09		0.92
540	1	47.69	3	77.7	1.75	25.37	1	92	0	3	20	48	36	8		2	-9	27.9	41	-1.39	0.29	-0.9	-0.61		-1.52	-0.36	0.44	0.92
541	1	47.7	3	84.3	1.79	26.46	1	84.33	0	3	80	55	65	15		35.5	4.75			-0.05	0.8	0.37	0.82		1.09	0.97
542	1	43.95	3	73.9	1.75	24.05	0	83.25	0	1	36	56	64	5		14	5		40	-1.03	0.87	0.33	-1.22		-0.59	0.99		0.83
543	1	46.49	3	83.3	1.78	26.29	1	91	0	4	44.5	56	65	8		22.5	1.75	30.9	48	-0.84	0.87	0.37	-0.61		0.08	0.68	0.82	1.6
544	1	42.31	3	66	1.61	25.46	1	87.67	0	2	35	40	30	12		30	-7		38	-1.05	-0.28	-1.16	0.2		0.66	-0.16		0.63
545	1	44.41	3	76	1.79	23.72	0	82.5	0	3	70	56	68	11		1	-11		39	-0.27	0.87	0.5	0		-1.6	-0.55		0.73
546	1	41.35	3	105.1	1.88	29.74	1	101	1	4	40	61	78	10		10.5	-20.5		36	-0.94	1.23	0.94	-0.2		-0.86	-1.46		0.44
547	1	43.66	3	88.5	1.8	27.31	1	99.5	1	1	51	47	64	10		16	-13		32	-0.7	0.22	0.33	-0.2		-0.43	-0.74		0.05
548	1	49.1	3	81.8	1.78	25.82	1	98	1		32.4	42	5	8		2	-15	15.4	19.5	-1.11	-0.14	-2.26	-0.61		-1.52	-0.93	-1.14	-1.17
549	1	47.53	3	92.7	1.79	29.09	1	98	1	4	34	52	73	15		16	-1.5		48	-1.08	0.58	0.72	0.82		-0.43	0.37		1.6
550	1	49.29	3	97.1	1.83	28.99	1	98.5	1	2	58	53	72	12		37	-3.5		35	-0.54	0.65	0.68	0.2		1.21	0.17		0.34
551	1	47.04	3	83.2	1.78	26.26	1	94.17	1	3	75	50	77	18		37	-12	21.34	23.5	-0.16	0.44	0.9	1.43		1.21	-0.64	-0.39	-0.78
552	1	40.73	3	83.8	1.75	27.52	1	99	1	3	78	56	76	16		21	8	35.2		-0.1	0.87	0.86	1.02		-0.04	1.28	1.37
553	1	45.85	3	81	1.76	26.15	1	97	1	2	39	58	66	11		16	-5	23.5		-0.96	1.01	0.42	0		-0.43	0.03	-0.11
554	1	46.9	3	91.1	1.9	25.24	1	98.5	1	4	105	60	80	15		6	-5	32.45		0.51	1.16	1.03	0.82		-1.21	0.03	1.02
555	1	47.87	3	100	1.9	27.85	1	101	1	4	60	70	65	11		23	-15.5	29		-0.5	1.88	0.37	0		0.12	-0.98	0.58
556	1	40.34	3	114.9	1.82	34.69	2	120.5	2	2	21	50	35	10		2	-27.5		30	-1.37	0.44	-0.94	-0.2		-1.52	-2.13		-0.15
557	1	43.94	3	110	1.82	33.21	2	114	2	2	18.2	63	37	7		24	-16.25		24.5	-1.43	1.37	-0.86	-0.82		0.2	-1.05		-0.68
558	1	43.59	3	116.3	1.91	31.88	2	111	2	2	62	75	62	7		2	-17.5		44	-0.45	2.24	0.24	-0.82		-1.52	-1.17		1.21
559	1	49.24	3	87.5	1.74	29.07	1	107	2	2	54	54	46	7		0	-10.5	21.6	34.5	-0.63	0.73	-0.46	-0.82		-1.68	-0.5	-0.35	0.29
560	1	49.8	3	96.1	1.69	33.65	2	108.5	2	2	60	43	44		7	12	-9		30.5	-0.5	-0.06	-0.55		-0.22	-0.74	-0.36		-0.1
561	1	44.02	3	106.1	1.82	32.21	2	110.1	2	2	12	52	62	9		0	-35.5		37	-1.57	0.58	0.24	-0.41		-1.68	-2.9		0.53
562	1	47.04	3	129	1.95	33.93	2	121.83	2	3	32.9	72	30	7		30	-19	19.4	25.5	-1.1	2.02	-1.16	-0.82		0.66	-1.32	-0.63	-0.58
563	1	43.88	3	112	1.73	37.42	2	114	2	2	51	60	68	6		18	-31.5	27.1	33	-0.7	1.16	0.5	-1.02		-0.27	-2.52	0.34	0.15
564	1	41.31	3	92.3	1.76	29.8	1	104.83	2	3	23	58	120	9		7	-20.5	29.01	33.5	-1.32	1.01	2.79	-0.41		-1.13	-1.46	0.58	0.19
565	1	49.99	3	84	1.76	27.12	1	102.73	2	2	67	56	63	14		31	-4	31.34	41	-0.34	0.87	0.29	0.61		0.74	0.12	0.88	0.92
566	1	45.3	3	105	1.75	34.29	2	107.67	2	2	63	62	14	12		12	-21		40	-0.43	1.3	-1.86	0.2		-0.74	-1.51		0.83
567	1	43.04	3	90.3	1.71	30.88	2	102.67	2	3	40	64	62	10		30	-6		40	-0.94	1.45	0.24	-0.2		0.66	-0.07		0.83
568	1	46.73	3	102	1.7	35.29	2	113	2	2	64	60	63	10		20.5	-17		32	-0.41	1.16	0.29	-0.2		-0.08	-1.13		0.05
569	1	41.4	3	97.8	1.79	30.52	2	112	2	2	75	56	65	11		27	-13	26.2		-0.16	0.87	0.37	0		0.43	-0.74	0.23
215	0	53.85	4	57.7	1.66	21.07	0			4	32	30	63	4		3	-13.5		26	-1.12	-1	0.29	-1.43		-1.45	-0.79		-0.53
216	0	56.42	4	57.2	1.74	18.89	0	75	0	4	180	25	65		13	37	-2.5		27	2.18	-1.36	0.37		1.11	1.21	0.27		-0.44
217	0	55.25	4	55.8	1.55	23.23	0	78	0	1	72	19	68		6	20	-18.5	13	16.5	-0.23	-1.79	0.5		-0.44	-0.12	-1.27	-1.44	-1.46
218	0	51.22	4	64.8	1.71	22.16	0	72.17	0	2	165	30	69		11	21	-5.75			1.84	-1	0.55		0.67	-0.04	-0.04
219	0	54.98	4	57.1	1.64	21.23	0	75.5	0	3	60	20	67		12	20	0.5			-0.5	-1.72	0.46		0.89	-0.12	0.56
220	0	55.76	4	57.2	1.63	21.63	0	72.5	0	3	130	27	66		8	28	0			1.06	-1.22	0.42		0	0.51	0.51
221	0	59.88	4	74.7	1.74	24.67	0	78.5	0	3	66	30	64			25	1			-0.36	-1	0.33			0.27	0.61
222	0	58.43	4	54.6	1.65	20.06	0	73.67	0	3	105	26	57	4		29	0	20.1	20.5	0.51	-1.29	0.02	-1.43		0.59	0.51	-0.54	-1.07
223	0	56.15	4	55.1	1.64	20.49	0	71.5	0	2	87	28	47		8	37	2.5	20.9	23	0.1	-1.14	-0.42		0	1.21	0.75	-0.44	-0.83
224	0	56.81	4	73	1.76	23.57	0	78.5	0	4	40	27	50		5	42	-6.5	17.6	19	-0.94	-1.22	-0.29		-0.67	1.6	-0.12	-0.86	-1.21
225	0	57.39	4	60.1	1.68	21.29	0	77.5	0	4	120	34	63		8	45	-1.5	19.44	23	0.84	-0.71	0.29		0	1.84	0.37	-0.63	-0.83
226	0	55.37	4	65.2	1.66	23.66	0	75.33	0		30	34	34		8	30	0		30	-1.16	-0.71	-0.99		0	0.66	0.51		-0.15
227	0	55.36	4	51.6	1.57	20.99	0	78	0	2	94	23	63		7	20.5	-2	18		0.26	-1.5	0.29		-0.22	-0.08	0.32	-0.81
228	0	57.55	4	52.3	1.62	19.93	0	83	1	1	123	28	63		4	16	-1	11.3	16.5	0.91	-1.14	0.29		-0.89	-0.43	0.41	-1.66	-1.46
229	0	52.28	4	82.3	1.61	31.75	2	87.33	1	2	67	28	65		15	36.5	4.25			-0.34	-1.14	0.37		1.56	1.17	0.92
230	0	55.7	4	67.2	1.68	23.95	0	81.67	1	4	181	29	66	10		13.5	-10.5			2.2	-1.07	0.42	-0.2		-0.63	-0.5
231	0	56.68	4	76.9	1.71	26.3	1	80	1	2		29	62		13	16	-11				-1.07	0.24		1.11	-0.43	-0.55
232	0	58.18	4	73.1	1.71	25	0	82	1	3	95	28	63	5		24	-13.5			0.28	-1.14	0.29	-1.22		0.2	-0.79
233	0	58.99	4	64.4	1.68	22.87	0	81	1	3	25	26	53		5	3	-19		18	-1.28	-1.29	-0.15		-0.67	-1.45	-1.32		-1.31
234	0	59.16	4	61.9	1.62	23.59	0	80	1	2	10	25	37		2	12	-8		16	-1.61	-1.36	-0.86		-1.33	-0.74	-0.26		-1.5
235	0	57.48	4	63.3	1.62	24.12	0	80.83	1	1	45	36	16		1	33	-8	27.3	31.5	-0.83	-0.57	-1.78		-1.56	0.9	-0.26	0.37	0
236	0	58.69	4	64	1.62	24.39	0	84.5	1	4	43	25	12	0	7	11	-2.25	14.6	11	-0.88	-1.36	-1.95	-2.24	-0.22	-0.82	0.29	-1.24	-1.99
237	0	57.39	4	77	1.73	25.73	1	84	1	3	88	36	65		9	38	-3	16.35	26	0.13	-0.57	0.37		0.22	1.29	0.22	-1.02	-0.53
238	0	59.56	4	60	1.65	22.04	0	84.5	1	2		31	21		0	16	-5.25	14.72			-0.93	-1.56		-1.78	-0.43	0	-1.23
239	0	59.56	4	59	1.7	20.54	0	81.5	1	3	60	27	6	7		10.5	-8.5	11.19		-0.5	-1.22	-2.21	-0.82		-0.86	-0.31	-1.67
240	0	56.33	4	62	1.71	21.2	0	87	1	3	125	28	62	7		13	-2.25	14.6		0.95	-1.14	0.24	-0.82		-0.66	0.29	-1.24
241	0	57.31	4	65.3	1.69	23	0	83.5	1	3	22	22	63		5		-10.75	14.6		-1.34	-1.58	0.29		-0.67		-0.52	-1.24
242	0	59.85	4	66.1	1.67	23.7	0	82	1	3	60	29	66		10	29	-3	15.9		-0.5	-1.07	0.42		0.44	0.59	0.22	-1.08
243	0	56.35	4	79	1.72	26.7	1	96.67	2	2	60	30	48	5		23	-6.5		15	-0.5	-1	-0.37	-1.22		0.12	-0.12		-1.6
244	0	56.94	4	82.4	1.68	29.2	1	98.25	2	1	60	32	18		8	20	-5		17	-0.5	-0.86	-1.69		0	-0.12	0.03		-1.41
245	0	57.78	4	76.1	1.54	32.09	2	93	2	2	49	24	32		11	22	-19.5		16	-0.74	-1.43	-1.07		0.67	0.04	-1.37		-1.5
246	0	59.48	4	78.1	1.69	27.34	1	102.33	2	4	30	24	11		8	3	0		19	-1.16	-1.43	-2		0	-1.45	0.51		-1.21
247	0	56.48	4	81	1.62	30.86	2	89	2	2	57	31	63		7	3	1	11.4	23.5	-0.56	-0.93	0.29		-0.22	-1.45	0.61	-1.65	-0.78
248	0	50.16	4	79.9	1.62	30.63	2	97.17	2	4	24	25	63		11	27	-5.75			-1.3	-1.36	0.29		0.67	0.43	-0.04
249	0	53	4	78.9	1.71	26.98	1	89.83	2	3		27	80	6		23	-2				-1.22	1.03	-1.02		0.12	0.32
250	0	56.09	4	68.1	1.69	23.84	0	89.17	2	3	103	29	16		5	30	-3	14.2	16.5	0.46	-1.07	-1.78		-0.67	0.66	0.22	-1.29	-1.46
251	0	59.55	4	80.7	1.78	25.47	1	90	2	4	20	32	60		6	27	5	13.2	22	-1.39	-0.86	0.15		-0.44	0.43	0.99	-1.42	-0.92
252	0	53.73	4	102.7	1.63	38.65	2	114.33	2	3	73	28	64		14	34	-22	13.9	29	-0.21	-1.14	0.33		1.33	0.98	-1.61	-1.33	-0.24
253	0	55.69	4	97	1.76	31.31	2	98.5	2	2	19.3	37	5		0	24	-2.7	13.8	20	-1.4	-0.5	-2.26		-1.78	0.2	0.25	-1.34	-1.12
254	0	56.34	4	80.3	1.61	30.98	2	97.63	2	2	6	28	4		0	19	-17	11.3	11.5	-1.7	-1.14	-2.3		-1.78	-0.2	-1.13	-1.66	-1.94
255	0	57.79	4	72.1	1.59	28.52	1	89.75	2	1	63	30	34		5	24	-7	17.8	18.5	-0.43	-1	-0.99		-0.67	0.2	-0.16	-0.84	-1.26
256	0	59.4	4	69	1.7	23.88	0	97	2	2	37	23	20		4	28	-6.5	15.16	14	-1.01	-1.5	-1.6		-0.89	0.51	-0.12	-1.17	-1.7
257	0	58.79	4	75	1.74	24.92	0	88.17	2	3	50	29	18	5		15.5	-20.5		15	-0.72	-1.07	-1.69	-1.22		-0.47	-1.46		-1.6
258	0	52.3	4	92	1.66	33.59	2	106.67	2	3	97	24	57			27.5	-6	15.2		0.33	-1.43	0.02			0.47	-0.07	-1.16
259	0	56.59	4	74	1.68	26.22	1	94	2	3	30	42	17		8	31	-2.5	16.11		-1.16	-0.14	-1.73		0	0.74	0.27	-1.05
260	0	58.47	4	70	1.67	25.1	1	95	2	4	40	36	45		6	39	-6	17.99		-0.94	-0.57	-0.5		-0.44	1.37	-0.07	-0.81
261	0	59	4	99.5	1.71	33.91	2	110	2	4	60	43	52		8	9	-14.5			-0.5	-0.06	-0.2		0	-0.98	-0.88
262	0	55.69	4	63.5	1.62	24.2	0	100	2	3	90	31	95		6	20	-5	14.1		0.17	-0.93	1.69		-0.44	-0.12	0.03	-1.3
263	0	57.16	4	81.5	1.68	29.05	1	102.17	2	2	61	28	67		15	19	-10.5	20		-0.47	-1.14	0.46		1.56	-0.2	-0.5	-0.56
264	0	54.48	4	54.6	1.5	24.27	0	72	0	4	90	27	70	14		50.5	-6.5		14	0.17	-1.22	0.59	0.61		2.27	-0.12		-1.7
265	0	54.96	4	61.3	1.67	21.98	0	76.67	0	1		30	65		5	16	-4		21		-1	0.37		-0.67	-0.43	0.12		-1.02
266	0	51.41	4	59.8	1.65	21.97	0	77	0	2	38	32	70		9	7	3	16.4	24	-0.99	-0.86	0.59		0.22	-1.13	0.8	-1.01	-0.73
267	0	51.41	4	68.1	1.63	25.63	1	79.5	0	3	211	35	66	16		37.5	0			2.87	-0.64	0.42	1.02		1.25	0.51
268	0	52.25	4	68	1.69	23.81	0	71	0	4	118	38	47		0	19	5.25	19.4	17	0.8	-0.42	-0.42		-1.78	-0.2	1.01	-0.63	-1.41
269	0	54.17	4	67.2	1.68	23.81	0	76.33	0	4	177	36	57	8		34	5.5		24	2.11	-0.57	0.02	-0.61		0.98	1.04		-0.73
270	0	53.79	4	53.5	1.72	18.08	0	68.5	0	4	208	30	10			33	1.5	21.95		2.8	-1	-2.04			0.9	0.65	-0.31
271	0	51.3	4	54	1.66	19.72	0	66.5	0	3	240	38	66	11		39	6.5	25.7		3.51	-0.42	0.42	0		1.37	1.13	0.16
272	0	51.4	4	57.8	1.6	22.58	0	67	0	3	240	38	66	18		18	-4			3.51	-0.42	0.42	1.43		-0.27	0.12
273	0	52.48	4	64	1.68	22.81	0	74.5	0	4	125	34	64		5	30.5	-5	21.4		0.95	-0.71	0.33		-0.67	0.7	0.03	-0.38
274	0	50.79	4	58.3	1.58	23.5	0	82.67	1	1	122	25	14		7	26	-8.5		12	0.88	-1.36	-1.86		-0.22	0.35	-0.31		-1.89
275	0	50.23	4	75	1.69	26.26	1	85	1	4	79	41	35		8	11	11.5	13.6	18	-0.07	-0.21	-0.94		0	-0.82	1.62	-1.37	-1.31
276	0	54.63	4	62.5	1.69	21.88	0	84	1	3	56	25	14		5	32	2.5	13.6	24	-0.59	-1.36	-1.86		-0.67	0.82	0.75	-1.37	-0.73
277	0	50.12	4	64.6	1.68	22.89	0	83.67	1	4	101	30	82		10	24	0	19.2	24.5	0.42	-1	1.12		0.44	0.2	0.51	-0.66	-0.68
278	0	53.67	4	67.2	1.61	25.92	1	87.83	1	1	46	22	65		5	16	1	15.9	28.5	-0.81	-1.58	0.37		-0.67	-0.43	0.61	-1.08	-0.29
279	0	50.61	4	64.2	1.65	23.58	0	80.83	1	2	175	34	68		9	22	3	20.46	24	2.06	-0.71	0.5		0.22	0.04	0.8	-0.5	-0.73
280	0	54.17	4	78	1.77	24.9	0	84.17	1	2	100	41	67		8	16	-7.5	18.01	20	0.39	-0.21	0.46		0	-0.43	-0.21	-0.81	-1.12
281	0	53.97	4	64	1.68	22.68	0	81.33	1	4	20	28	47			30	-9		14	-1.39	-1.14	-0.42			0.66	-0.36		-1.7
282	0	54.57	4	63	1.66	22.86	0	80.33	1	4	182	30	34	6		18	3.5		18	2.22	-1	-0.99	-1.02		-0.27	0.85		-1.31
283	0	54.99	4	60.4	1.7	20.9	0	85.5	1	3	180	33	64	8		19.5	-12.25	21.8		2.18	-0.78	0.33	-0.61		-0.16	-0.67	-0.33
284	0	53.47	4	79.3	1.76	25.75	1	89.33	2	3	62	35	64		13	41	5.5		18.5	-0.45	-0.64	0.33		1.11	1.52	1.04		-1.26
285	0	50.94	4	88.5	1.65	32.51	2	106	2	4	67	31	67.5		7	15	-9		22	-0.34	-0.93	0.48		-0.22	-0.51	-0.36		-0.92
286	0	53.22	4	95.5	1.81	29.15	1	98	2	3	42	58	74	8		3	-19	16	26	-0.9	1.01	0.77	-0.61		-1.45	-1.32	-1.06	-0.53
287	0	52.18	4	74.6	1.65	27.37	1	93.5	2	3	136	40	66	12		5	-6.5		32.5	1.2	-0.28	0.42	0.2		-1.29	-0.12		0.1
288	0	53.11	4	75.6	1.59	29.73	1	96.5	2	3	41	25	66		10	10	-0.5		21	-0.92	-1.36	0.42		0.44	-0.9	0.46		-1.02
289	0	50.07	4	83.3	1.68	29.69	1	95.17	2	2	58	38	32	5		30.5	-10	21.7	22	-0.54	-0.42	-1.07	-1.22		0.7	-0.45	-0.34	-0.92
290	0	52.58	4	77.1	1.69	26.99	1	92.17	2	4	58	33	28		14	29	-12.5		22.5	-0.54	-0.78	-1.25		1.33	0.59	-0.69		-0.87
291	0	54.95	4	84	1.71	28.73	1	97.25	2	2	42	34	32		0	19	-12.5	20.2	23	-0.9	-0.71	-1.07		-1.78	-0.2	-0.69	-0.53	-0.83
292	0	50.8	4	65.7	1.66	23.99	0	88.75	2	4	22	38	62		9	36	-25	16.4		-1.34	-0.42	0.24		0.22	1.13	-1.89	-1.01
293	0	53.8	4	71.5	1.66	25.95	1	79.93		1	44.8	20	61.7	0	0	21.5	-4	12.3	10	-0.84	-1.72	0.23	-2.24	-1.78	0	0.12	-1.53	-2.09
294	0	50.94	4	62	1.65	22.77	0	73	0	3	120	26	76		13	24	0.5			0.84	-1.29	0.86		1.11	0.2	0.56
295	0	51.5	4	84	1.68	29.76	1	87.17	1	2	47	30	68		2	23		17.49	27	-0.79	-1	0.5		-1.33	0.12		-0.87	-0.44
296	0	51.37	4	120.3	1.69	42.12	2	122	2	3	48	42	29	9		35	-3		21	-0.76	-0.14	-1.21	-0.41		1.05	0.22		-1.02
297	0	52.41	4	77.5	1.73	26.04	1	90	2	3	60	31	44		13	20	1.5		16	-0.5	-0.93	-0.55		1.11	-0.12	0.65		-1.5
298	0	53.33	4	82	1.69	28.71	1	90.5	2	2	50	29	66	3		38	-5.25	22.2	26	-0.72	-1.07	0.42	-1.63		1.29	0	-0.28	-0.53
299	0	54.83	4	84.5	1.65	31.23	2	98	2	4	101	39	66			44		22.47	29	0.42	-0.35	0.42			1.76		-0.24	-0.24
300	0	54.07	4	81	1.64	30.3	2	98.17	2	1	53	35	9		6	24	-18		28	-0.65	-0.64	-2.08		-0.44	0.2	-1.22		-0.34
301	0	54.17	4	87.3	1.61	33.68	2	104	2	4	80	32	47		8	32	-9.5		10	-0.05	-0.86	-0.42		0	0.82	-0.4		-2.09
302	0	51.84	4	72	1.52	31.16	2	94.67	2	3	167	27	39	9		28	-4.75	12.1		1.89	-1.22	-0.77	-0.41		0.51	0.05	-1.56
303	0	54.55	4	60	1.63	22.58	0	91.17	2	4	81	30	79	14		20	-6	21.5		-0.03	-1	0.99	0.61		-0.12	-0.07	-0.37
570	1	58.08	4	74.4	1.71	25.44	1			1	68	55	42	7		-2	-19.5		33	-0.32	0.8	-0.64	-0.82		-1.84	-1.37		0.15
571	1	56.53	4	81.5	1.8	25.15	1			2		48									0.29
572	1	56.39	4	83.7	1.86	24.19	0	90.5	0	2	20	70	65	11		7	-1	25.9		-1.39	1.88	0.37	0		-1.13	0.41	0.19
573	1	59.31	4	91	1.84	26.88	1	101	1	2	48	65	63	10		17	4.5	27.8		-0.76	1.52	0.29	-0.2		-0.35	0.94	0.43
574	1	59.26	4	95.5	1.9	26.45	1	96.17	1	3	70	49	37	10		10	-11.75			-0.27	0.37	-0.86	-0.2		-0.9	-0.62
575	1	50.44	4	90.5	1.81	27.62	1	100.83	1	2	19.5	40	72	12		22	-21			-1.4	-0.28	0.68	0.2		0.04	-1.51
576	1	53.67	4	95	1.85	27.76	1	95.5	1	2	60	56	65	19		26	-6.25			-0.5	0.87	0.37	1.63		0.35	-0.09
577	1	55.04	4	90.6	1.83	27.05	1	100.17	1	4	23.5	52	64	11		30	6			-1.31	0.58	0.33	0		0.66	1.09
578	1	58.74	4	92.5	1.86	26.74	1	103.67	2	2	58	54	8	15		21	-19		34	-0.54	0.69	-2.13	0.82		-0.04	-1.32		0.24
579	1	53.17	4	90	1.74	29.9	1	105	2	2	73	63	75	13		19.5	-11.75		46	-0.21	1.37	0.81	0.41		-0.16	-0.62		1.41
580	1	57.6	4	78.3	1.9	21.69	0	82	0	4	76	59	15	14		37.5	4		52	-0.14	1.09	-1.82	0.61		1.25	0.89		1.99
581	1	51.99	4	83.9	1.86	24.38	0	91.5	0	3	67	60	63	13		35	-3		41	-0.34	1.16	0.29	0.41		1.05	0.22		0.92
582	1	54.36	4	78.1	1.88	22.1	0	90	0	1	32	60	63	10		23	-23		41	-1.12	1.16	0.29	-0.2		0.12	-1.7		0.92
583	1	55.48	4	83.7	1.84	24.72	0	91.5	0	3	60	62	63	11		14	-7		47	-0.5	1.3	0.29	0		-0.59	-0.16		1.5
584	1	56.81	4	87.6	1.78	27.65	1	89	0	4	61	64	72	16		31	-22		38.5	-0.47	1.45	0.68	1.02		0.74	-1.61		0.68
585	1	59.77	4	85.2	1.93	22.87	0	88	0	4	36	63	41		13	8	8	19.7		-1.03	1.37	-0.68		1.11	-1.05	1.28	-0.59
586	1	55.88	4	67	1.77	21.39	0	77	0	1	53.3	42	62	13		3	-5		33	-0.65	-0.14	0.24	0.41		-1.45	0.03		0.15
587	1	52.36	4	86.2	1.78	27.21	1	81.25	0	2	16	44	37	15		14.5	-22			-1.48	0.01	-0.86	0.82		-0.55	-1.61
588	1	57.64	4	75.6	1.74	24.97	0	90	0	3	60	51	67	10		17.5	-3			-0.5	0.51	0.46	-0.2		-0.31	0.22
589	1	52.26	4	75.4	1.75	24.51	0	87.25	0	3	21	44	40	5		-5	5		38	-1.37	0.01	-0.72	-1.22		-2.07	0.99		0.63
590	1	52.78	4	71.5	1.77	22.9	0	78.5	0	2	55	42	59	8		-7	-4		30	-0.61	-0.14	0.11	-0.61		-2.23	0.12		-0.15
591	1	58.6	4	62.5	1.6	24.41	0	86.5	0	2	35	30	20	22		21.5	-18.5		27	-1.05	-1	-1.6	2.24		0	-1.27		-0.44
592	1	58.82	4	77.1	1.77	24.61	0	91.67	0	1	64	40	20			15			36	-0.41	-0.28	-1.6			-0.51			0.44
593	1	50.25	4	83.5	1.85	24.4	0	93.33	0	4	127	52	72	11		22	5		49.5	1	0.58	0.68	0		0.04	0.99		1.75
594	1	52.99	4	78.3	1.82	23.64	0	93.5	0	1	17	60	54	6		17	-9.5	25.3	30	-1.45	1.16	-0.11	-1.02		-0.35	-0.4	0.11	-0.15
595	1	58.7	4	83.7	1.89	23.43	0	83	0	4		54	20	6		-6	-14.25	28	35		0.73	-1.6	-1.02		-2.15	-0.86	0.46	0.34
596	1	50.3	4	88.2	1.84	26.05	1	92.5	0	4	77	58	68	7		17.5	-9	35.3	47.5	-0.12	1.01	0.5	-0.82		-0.31	-0.36	1.38	1.55
597	1	51.68	4	74.1	1.66	26.89	1	91.5	0	3	53	50	64	11		33	-15.5	35.08	47	-0.65	0.44	0.33	0		0.9	-0.98	1.35	1.5
598	1	56.5	4	75.6	1.75	24.69	0	82.5	0	3	89	53	91	11		14	0.25	31.12	42.5	0.15	0.65	1.51	0		-0.59	0.53	0.85	1.07
599	1	57.91	4	73.4	1.82	22.16	0	93.67	0	3	100	57	63	5		22	-13.5	23.06	32	0.39	0.94	0.29	-1.22		0.04	-0.79	-0.17	0.05
600	1	57.98	4	86	1.9	23.82	0	83.5	0	4	75	59	66	10		26	4.5	30.85	38	-0.16	1.09	0.42	-0.2		0.35	0.94	0.82	0.63
601	1	54.82	4	77.6	1.74	25.63	1	92	0	2	105	60	17	7		26	-40		38	0.51	1.16	-1.73	-0.82		0.35	-3.34		0.63
602	1	57.73	4	75	1.79	23.41	0	81.67	0	4	120	50	43	10		23	-22		47	0.84	0.44	-0.59	-0.2		0.12	-1.61		1.5
603	1	52.22	4	71.7	1.81	22.01	0	89.33	0	4	130	56	10	12		21	-1.5	30.38		1.06	0.87	-2.04	0.2		-0.04	0.37	0.76
604	1	58.35	4	65	1.82	19.73	0	77	0	3		55	6								0.8	-2.21
605	1	52.76	4	73.5	1.77	23.59	0	85.5	0	2	52	54	67	13		37	-9.5	28		-0.67	0.73	0.46	0.41		1.21	-0.4	0.46
606	1	53.79	4	80.6	1.77	25.73	1	98	1	2	152	38	32	9		1	-20	18.8	33.5	1.55	-0.42	-1.07	-0.41		-1.6	-1.41	-0.71	0.19
607	1	57.93	4	75	1.69	26.26	1	97	1	2	106	39	34	12		6	-10.5	25.2	37	0.53	-0.35	-0.99	0.2		-1.21	-0.5	0.1	0.53
608	1	53.01	4	90.7	1.78	28.63	1	96	1	4		39	65	14		12	-4.5				-0.35	0.37	0.61		-0.74	0.08
609	1	55.99	4	80.4	1.7	27.82	1	100	1		61	55	78	10		4	-14.5	27.2	34.5	-0.47	0.8	0.94	-0.2		-1.37	-0.88	0.35	0.29
610	1	56.96	4	83.7	1.8	25.83	1	94	1	2	16	56	64	9		-3	-21		35	-1.48	0.87	0.33	-0.41		-1.91	-1.51		0.34
611	1	56.86	4	91.2	1.86	26.25	1	99.5	1	2	16	44	53	7		15	-9		30	-1.48	0.01	-0.15	-0.82		-0.51	-0.36		-0.15
612	1	50.92	4	87.4	1.78	27.49	1	95.25	1	4	38	46	62	14		-10	-8		36	-0.99	0.15	0.24	0.61		-2.46	-0.26		0.44
613	1	56.78	4	98.2	1.85	28.69	1	100.33	1	1	74	51	64	13		20.5	-6	21.5		-0.18	0.51	0.33	0.41		-0.08	-0.07	-0.37
614	1	57.71	4	86.5	1.81	26.4	1	94.33	1	2	83	43	65	14		29	-9		32.5	0.02	-0.06	0.37	0.61		0.59	-0.36		0.1
615	1	54.44	4	78.5	1.75	25.63	1	98.67	1	3	52.4	58	64	8		15.5	-13.5	29.4	38	-0.67	1.01	0.33	-0.61		-0.47	-0.79	0.63	0.63
616	1	56.16	4	85.8	1.75	28.02	1	97.5	1	2	52	57	70	11		19	-13	29.1	39	-0.67	0.94	0.59	0		-0.2	-0.74	0.59	0.73
617	1	56.71	4	83	1.8	25.62	1	97.77	1	3	27.9	45	62	0	4	2	-22	30	33	-1.21	0.08	0.24	-2.24	-0.89	-1.52	-1.61	0.71	0.15
618	1	59.12	4	86	1.81	26.25	1	96.5	1	2	59	56	63	5		26	-27.5	15.8	22	-0.52	0.87	0.29	-1.22		0.35	-2.13	-1.09	-0.92
619	1	52.74	4	89	1.96	23.17	0	95.75	1	4	120	72	20	12		9	-4	27.37		0.84	2.02	-1.6	0.2		-0.98	0.12	0.38
620	1	56.11	4	81.7	1.71	28.1	1	94.25	1	3	100	54	62	15		30	-7.5	25.25		0.39	0.73	0.24	0.82		0.66	-0.21	0.11
621	1	58.18	4	102	1.85	29.8	1	111	2	2	73	50	28	10		3	-8.5	24.3	41	-0.21	0.44	-1.25	-0.2		-1.45	-0.31	-0.01	0.92
622	1	56.73	4	98.5	1.81	30.07	2	106.33	2	2	60	46	38	3		17	-9.5	20.4	28	-0.5	0.15	-0.81	-1.63		-0.35	-0.4	-0.51	-0.34
623	1	57.01	4	86.7	1.74	28.64	1	105	2	2	21.4	40	5	8		18	-16	17.9	32	-1.36	-0.28	-2.26	-0.61		-0.27	-1.03	-0.82	0.05
624	1	58.87	4	114.1	1.85	33.34	2	114.17	2	2		44	25			16	-37	21.4	24		0.01	-1.38			-0.43	-3.05	-0.38	-0.73
625	1	53.86	4	88	1.83	26.28	1	108	2	2	10	59	4	8		27	-14.5	26.3		-1.61	1.09	-2.3	-0.61		0.43	-0.88	0.24
626	1	55.5	4	80.8	1.85	23.61	0	91.5	0	3	122	50	63	10		30.5	-9		29	0.88	0.44	0.29	-0.2		0.7	-0.36		-0.24
627	1	53.24	4	83.6	1.83	24.96	0	85	0	2	57	62	68	20		8	-26.5	25.3	42.3	-0.56	1.3	0.5	1.84		-1.05	-2.04	0.11	1.05
628	1	53.39	4	83.1	1.78	26.23	1	91.5	0	2	68	53	62	4		7	-1.25	24.1	29.7	-0.32	0.65	0.24	-1.43		-1.13	0.39	-0.04	-0.17
629	1	54.79	4	84.5	1.78	26.67	1	89.5	0	4	90	66	64	6		14	11		31	0.17	1.59	0.33	-1.02		-0.59	1.57		-0.05
630	1	50.66	4	84.2	1.78	26.72	1	93.5	0	2	65	61	11	6		23.5	-14.75		27.5	-0.39	1.23	-2	-1.02		0.16	-0.91		-0.39
631	1	51.29	4	81.2	1.8	25.2	1	93	0	2	82	50	33	9		17	-2		37	-0.01	0.44	-1.03	-0.41		-0.35	0.32		0.53
632	1	54.84	4	75.5	1.71	25.82	1	86.67	0	4	55	59	64	11		35	-9.5		40	-0.61	1.09	0.33	0		1.05	-0.4		0.83
633	1	59.28	4	85	1.79	26.53	1	92.67	0	4	80	62	61	12		15	-27.5		40	-0.05	1.3	0.2	0.2		-0.51	-2.13		0.83
634	1	58.45	4	78.6	1.78	24.81	0	89.5	0	2		64	63	9		32	-11	32.5			1.45	0.29	-0.41		0.82	-0.55	1.03
635	1	51.61	4	92.6	1.88	26.2	1	97.75	1	4	77	54	21	15		28	5.5		36	-0.12	0.73	-1.56	0.82		0.51	1.04		0.44
636	1	56.03	4	87.1	1.83	26.01	1	99	1	3	75	55	34	11		30	-5		32	-0.16	0.8	-0.99	0		0.66	0.03		0.05
637	1	57.87	4	90.3	1.79	28.18	1	98	1	1	120	53	64	13		30	-6.5		38	0.84	0.65	0.33	0.41		0.66	-0.12		0.63
638	1	58.34	4	79.9	1.65	29.35	1	99.5	1	2	108	52	62	13		22	-9.5		37	0.57	0.58	0.24	0.41		0.04	-0.4		0.53
639	1	59.67	4	82.4	1.72	27.85	1	99.25	1	2	122	55	17	17		6	-8		37	0.88	0.8	-1.73	1.22		-1.21	-0.26		0.53
640	1	51.7	4	81.2	1.71	27.87	1	94.5	1	4	47	52	62		17	1	-29		29	-0.79	0.58	0.24		2	-1.6	-2.28		-0.24
641	1	59.87	4	80.3	1.76	25.92	1	96.67	1	4	134	45	30	9		6	-15			1.15	0.08	-1.16	-0.41		-1.21	-0.93
642	1	56.34	4	95.5	1.83	28.52	1	97.75	1	4	57	58	63	15		18	-8.5		34	-0.56	1.01	0.29	0.82		-0.27	-0.31		0.24
643	1	59.76	4	83	1.78	26.2	1	94.5	1	3	11	60	63	8		33	2.5	33	40	-1.59	1.16	0.29	-0.61		0.9	0.75	1.09	0.83
644	1	54.09	4	78.3	1.78	24.71	0	97.67	1	1	109	51	13	14		15	-22.5	25.91	30	0.59	0.51	-1.91	0.61		-0.51	-1.65	0.19	-0.15
645	1	54.91	4	87.5	1.79	27.31	1	101.5	1	2	45	53	63	11		32	-15.5	24.8	31	-0.83	0.65	0.29	0		0.82	-0.98	0.05	-0.05
646	1	59.37	4	78.5	1.71	26.85	1	100.75	1	3	77	40	62	10		10	-2.5	33.51	39	-0.12	-0.28	0.24	-0.2		-0.9	0.27	1.15	0.73
647	1	51.93	4	86.5	1.71	29.51	1	101	1		48	56	62	14		29.5	-9.5		46	-0.76	0.87	0.24	0.61		0.63	-0.4		1.41
648	1	50.36	4	93	1.75	30.37	2	101	1	3	97	52	46	8		19	-11	27.8		0.33	0.58	-0.46	-0.61		-0.2	-0.55	0.43
649	1	56.55	4	77.5	1.7	26.98	1	96	1	4	30	42	5		9	21	-3	19		-1.16	-0.14	-2.26		0.22	-0.04	0.22	-0.68
650	1	52.1	4	83	1.72	28.06	1	96.5	1	2	50	48	62	14		33	-18	23.8		-0.72	0.29	0.24	0.61		0.9	-1.22	-0.08
651	1	52.53	4	92.6	1.87	26.48	1	98.25	1	3	61	64	63	11		29	10	41.5		-0.47	1.45	0.29	0		0.59	1.47	2.16
652	1	54.17	4	87.4	1.83	26.1	1	94	1	4	158	56	65	15		14	-18.5	31.76		1.69	0.87	0.37	0.82		-0.59	-1.27	0.93
653	1	56.01	4	73.8	1.71	25.24	1	96.5	1	3	61	59	82	15		12	-23.5	26.9		-0.47	1.09	1.12	0.82		-0.74	-1.75	0.32
654	1	58.23	4	88	1.79	27.62	1	100	1	4	100	54	71	14		33	-1	37.02		0.39	0.73	0.64	0.61		0.9	0.41	1.6
655	1	54.33	4	90.5	1.87	25.88	1	102	2	3	60.7	54	51		8	9	-8.5		35	-0.48	0.73	-0.24		0	-0.98	-0.31		0.34
656	1	50.07	4	99.1	1.82	29.92	1	104	2	2	55	60	66	8		19.5	-12.75		34	-0.61	1.16	0.42	-0.61		-0.16	-0.72		0.24
657	1	52.21	4	107.3	1.82	32.39	2	107.5	2	2	60	53	63	10		15	-18.5		35	-0.5	0.65	0.29	-0.2		-0.51	-1.27		0.34
658	1	55.37	4	95.7	1.89	26.93	1	102	2	2	60	62	63	9		17	6		35	-0.5	1.3	0.29	-0.41		-0.35	1.09		0.34
659	1	50.42	4	107.6	1.79	33.51	2	117.5	2	2	65	54	21		6	-2	-12.5		32	-0.39	0.73	-1.56		-0.44	-1.84	-0.69		0.05
660	1	52.28	4	99	1.81	30.22	2	103	2	2	56	48	38			20	-28.5	22.5	31	-0.59	0.29	-0.81			-0.12	-2.23	-0.24	-0.05
661	1	53.35	4	91.4	1.72	30.9	2	107.83	2	2	65	45	64.7	8		7	-19.25	31.1	39	-0.39	0.08	0.36	-0.61		-1.13	-1.34	0.85	0.73
662	1	55.37	4	96.5	1.93	25.91	1	105	2	2	31.3	54	62.5	1		6.5	-24	28.3	31	-1.14	0.73	0.26	-2.04		-1.17	-1.8	0.49	-0.05
663	1	58.44	4	85.3	1.74	28.17	1	104.5	2	4	47.3	44	67	0	3	22.5	-19	26.5	30	-0.78	0.01	0.46	-2.24	-1.11	0.08	-1.32	0.27	-0.15
664	1	55.53	4	87.3	1.73	29.17	1	107.5	2	3	60	58	68			24	-16.5	27.51	39	-0.5	1.01	0.5			0.2	-1.08	0.39	0.73
665	1	53.19	4	100.8	1.73	33.68	2	108.67	2	2	150	62	38	10		-22	-15		35	1.51	1.3	-0.81	-0.2		-3.4	-0.93		0.34
666	1	52.79	4	125	1.88	35.37	2	128.25	2	1	15	48	43		8	-7	-12	12.03		-1.5	0.29	-0.59		0	-2.23	-0.64	-1.57
667	1	55.42	4	86.8	1.74	28.67	1	104.5	2	4	62	52	19	11		23	-14	17.7		-0.45	0.58	-1.64	0		0.12	-0.84	-0.85
668	1	59.95	4	105	1.82	31.7	2	108	2	3	68	64	20	9		22	-14.5	25.3		-0.32	1.45	-1.6	-0.41		0.04	-0.88	0.11
669	1	51.63	4	97	1.8	29.94	1	109	2	3		59	61	13		6	-14	22.4			1.09	0.2	0.41		-1.21	-0.84	-0.25
670	1	52.21	4	103.5	1.86	30.08	2	108.5	2	4		61	63	6		13	-6.5	30.2			1.23	0.29	-1.02		-0.66	-0.12	0.73
671	1	59.09	4	87.2	1.79	27.37	1	102.5	2	3	58	58	66	9		3	-12.5	18.6		-0.54	1.01	0.42	-0.41		-1.45	-0.69	-0.73
304	0	64.17	5	55	1.75	17.96	0			2	69	28	63		11	14	3.5	9.73	16	-0.3	-1.14	0.29		0.67	-0.59	0.85	-1.86	-1.5
305	0	64.26	5	86.6	1.72	29.44	1			3	5	32	10		8	-1	-23			-1.72	-0.86	-2.04		0	-1.76	-1.7
306	0	63.43	5	52.5	1.62	20.13	0	73	0	2	120	25	35		9	12	6.5		18	0.84	-1.36	-0.94		0.22	-0.74	1.13		-1.31
307	0	63.95	5	52.1	1.67	18.79	0	67.1	0	4	87	26	27	5		-6	0		19	0.1	-1.29	-1.29	-1.22		-2.15	0.51		-1.21
308	0	64.83	5	65.5	1.58	26.24	1	78.33	0	3	64		7			33	1.5	6.7		-0.41		-2.17			0.9	0.65	-2.24
309	0	62.28	5	62	1.7	21.45	0	73	0	4		32	65		9	14	1		20		-0.86	0.37		0.22	-0.59	0.61		-1.12
310	0	60.75	5	59.5	1.71	20.47	0	72.67	0	2	37	32	14			32	-15		20	-1.01	-0.86	-1.86			0.82	-0.93		-1.12
311	0	64.8	5	62	1.64	23.05	0	78.33	0	4	110	31	15		9	15.5	-8.5		25.5	0.62	-0.96	-1.82		0.22	-0.47	-0.31		-0.58
312	0	64.83	5	61	1.65	22.41	0	71.33	0	1	180	22	43	7		38	-7.5		16	2.18	-1.58	-0.59	-0.82		1.29	-0.21		-1.5
313	0	60.27	5	62.7	1.66	22.75	0	78	0	4	95	40	63	9		34.5	-0.5		26.5	0.28	-0.28	0.29	-0.41		1.02	0.46		-0.49
314	0	64.71	5	53.2	1.59	21.04	0	73.5	0	1	35	28	50		4	15	-3.5	10.6		-1.05	-1.14	-0.29		-0.89	-0.51	0.17	-1.75
315	0	60.57	5	54	1.57	21.91	0	75.25	0	3	60	29	70		12	36	-1.5	16.66		-0.5	-1.07	0.59		0.89	1.13	0.37	-0.98
316	0	61.06	5	58	1.71	19.84	0	76.5	0	3	159	33	73			38	1.5	15.1		1.71	-0.78	0.72			1.29	0.65	-1.18
317	0	63.87	5	62	1.63	23.48	0	72	0	3	96	30	62		4	16	-4.5	21.7		0.31	-1	0.24		-0.89	-0.43	0.08	-0.34
318	0	63.41	5	65	1.6	25.39	1	83	1	2	64	32	65		6	21	-18.5	10.4	19.5	-0.41	-0.86	0.37		-0.44	-0.04	-1.27	-1.77	-1.17
319	0	63.31	5	61.8	1.63	23.4	0	83.35	1	2	62	24	13		5	-17	-11.5		23	-0.45	-1.43	-1.91		-0.67	-3.01	-0.6		-0.83
320	0	63.87	5	67.3	1.66	24.36	0	81	1	2	32	30	17		7	9	-11		18	-1.12	-1	-1.73		-0.22	-0.98	-0.55		-1.31
321	0	64.47	5	67.5	1.72	22.72	0	80	1	4	70	36	63.5		9	7	-10		24	-0.27	-0.57	0.31		0.22	-1.13	-0.45		-0.73
322	0	61.07	5	65.4	1.62	24.92	0	87.83	1	4	43	26	37	1		30	0	12.5		-0.88	-1.29	-0.86	-2.04		0.66	0.51	-1.51
323	0	64.12	5	76	1.65	28.09	1	87	1	1	45	18	5		4	35	-4.5	13.5		-0.83	-1.86	-2.26		-0.89	1.05	0.08	-1.38
324	0	60.61	5	73.3	1.64	27.25	1	84.17	1	1	44.4		64.5		0	15.5	3.75		19	-0.84		0.35		-1.78	-0.47	0.87		-1.21
325	0	62	5	65.7	1.6	25.66	1	82.5	1	1	31	24	35		11	18	-9.75	15.88	18	-1.14	-1.43	-0.94		0.67	-0.27	-0.43	-1.08	-1.31
326	0	64.78	5	61.7	1.59	24.41	0	83	1	4	40	28	63		7	30	5	19.68	24	-0.94	-1.14	0.29		-0.22	0.66	0.99	-0.6	-0.73
327	0	61.99	5	57.6	1.62	21.95	0	84.33	1	3	124	25	64	6		32	-3		21.5	0.93	-1.36	0.33	-1.02		0.82	0.22		-0.97
328	0	64.62	5	69.5	1.69	24.33	0	86	1	2	115	36	22	2		23.5	-4	15.3		0.73	-0.57	-1.51	-1.84		0.16	0.12	-1.15
329	0	60.54	5	66	1.69	23.11	0	81	1	4	240	29	67		9	31	-4.5	21.1		3.51	-1.07	0.46		0.22	0.74	0.08	-0.42
330	0	62.31	5	79.5	1.76	25.67	1	84	1	4	121	40	63		3	22	-8	16.6		0.86	-0.28	0.29		-1.11	0.04	-0.26	-0.99
331	0	64.74	5	62	1.57	25.15	1	80	1	4	65	33	65	5		36	-3.5	15.1		-0.39	-0.78	0.37	-1.22		1.13	0.17	-1.18
332	0	62.68	5	74.2	1.63	27.93	1	96	2	1	60	24	14		9	36	-1		11	-0.5	-1.43	-1.86		0.22	1.13	0.41		-1.99
333	0	64.57	5	104.7	1.73	34.98	2	103.5	2	4		29	15		7	19	-28		7		-1.07	-1.82		-0.22	-0.2	-2.18		-2.38
334	0	60.38	5	74.1	1.69	25.94	1	92	2	3	96	27	62		16	24	-9.5		17.5	0.31	-1.22	0.24		1.78	0.2	-0.4		-1.36
335	0	61.79	5	62.7	1.63	23.74	0	88	2	2	60	23	64		8	26	-11		9.5	-0.5	-1.5	0.33		0	0.35	-0.55		-2.14
336	0	64.71	5	76	1.67	27.25	1	98	2		130	25	21		5	0	-13.5		10	1.06	-1.36	-1.56		-0.67	-1.68	-0.79		-2.09
337	0	63.3	5	77.5	1.74	25.6	1	92	2	1	61	38	63		7	39	-2	15.2	24	-0.47	-0.42	0.29		-0.22	1.37	0.32	-1.16	-0.73
338	0	60.41	5	64.7	1.68	22.95	0	89.25	2	1	45	22	31		7	11	-10		21	-0.83	-1.58	-1.12		-0.22	-0.82	-0.45		-1.02
339	0	61.75	5	71.4	1.67	25.61	1	88.2	2	2	45	25	25	7		15	5		21	-0.83	-1.36	-1.38	-0.82		-0.51	0.99		-1.02
340	0	61.07	5	89	1.68	31.53	2	114.33	2	1	26	22	5		0	42	-3		14	-1.25	-1.58	-2.26		-1.78	1.6	0.22		-1.7
341	0	62.05	5	73.8	1.67	26.46	1	88.17	2	2	80	30	21		3	25	-1.5	13	16.5	-0.05	-1	-1.56		-1.11	0.27	0.37	-1.44	-1.46
342	0	63.59	5	68.7	1.53	29.35	1	96.5	2	2	54	20	65			5	-20			-0.63	-1.72	0.37			-1.29	-1.41
343	0	64.11	5	70.5	1.68	24.98	0	90	2	2	45	35	18	5		26	3	24.6	27	-0.83	-0.64	-1.69	-1.22		0.35	0.8	0.03	-0.44
344	0	64.62	5	88.5	1.73	29.57	1	103.83	2	1		25	10	0	0	14.5	0.25	31	11		-1.36	-2.04	-2.24	-1.78	-0.55	0.53	0.84	-1.99
345	0	62.27	5	77	1.7	26.64	1	88.67	2	3	240	32	28		11	43	6.75	14.55	14.5	3.51	-0.86	-1.25		0.67	1.68	1.16	-1.25	-1.65
346	0	62.95	5	84.3	1.64	31.34	2	97	2	4	83	25	32		4	27.5	-6.5		25	0.02	-1.36	-1.07		-0.89	0.47	-0.12		-0.63
347	0	61.35	5	86	1.77	27.61	1	97.5	2	2	125	38	47		4	26	-8	9.4		0.95	-0.42	-0.42		-0.89	0.35	-0.26	-1.9
348	0	62.64	5	91.5	1.63	34.44	2	109	2	3	104	28	14		9	24	-16	12.1		0.48	-1.14	-1.86		0.22	0.2	-1.03	-1.56
349	0	64.06	5	82.5	1.65	30.49	2	103	2	2	70	31	15	9		24	-15.5	10.68		-0.27	-0.93	-1.82	-0.41		0.2	-0.98	-1.74
350	0	62.92	5	74.5	1.58	30.03	2	97	2	2		30	66		7	26	-14	17.59			-1	0.42		-0.22	0.35	-0.84	-0.86
672	1	63.1	5	95.5	1.8	29.48	1			2	25	30	6	7		9	-14.5		21.5	-1.28	-1	-2.21	-0.82		-0.98	-0.88		-0.97
673	1	63.41	5	61.9	1.64	23.01	0	84.25	0	2	67	42	5	6		36	-3.25		28.5	-0.34	-0.14	-2.26	-1.02		1.13	0.2		-0.29
674	1	60.59	5	79.6	1.84	23.51	0	90	0	3	63	55	63	10		0	-11		26	-0.43	0.8	0.29	-0.2		-1.68	-0.55		-0.53
675	1	61.62	5	80.4	1.85	23.62	0	90.67	0	2	62	46	64.5		8	13	-5.25			-0.45	0.15	0.35		0	-0.66	0
676	1	63.93	5	78.4	1.67	28.11	1	93	0	4	80	46	77	17		21	-17.5			-0.05	0.15	0.9	1.22		-0.04	-1.17
677	1	60.72	5	72.9	1.75	23.8	0	92.83	0	4	37	40	28	6		16	2.5	21.4	25.5	-1.01	-0.28	-1.25	-1.02		-0.43	0.75	-0.38	-0.58
678	1	62.38	5	71.5	1.74	23.62	0	86.33	0	4	58	37	26	13		30.5	-9.5	21.8	29.5	-0.54	-0.5	-1.34	0.41		0.7	-0.4	-0.33	-0.19
679	1	62.7	5	83.1	1.85	24.28	0	87.5	0	2	48.6	52	14	9		18	-9.5	14.3	32	-0.75	0.58	-1.86	-0.41		-0.27	-0.4	-1.28	0.05
680	1	63.19	5	63	1.72	21.3	0	76.67	0	1		32	57	4		27	-0.75	14.9	21.5		-0.86	0.02	-1.43		0.43	0.44	-1.2	-0.97
681	1	64.29	5	78	1.81	23.81	0	87.33	0	2	93	51	23	17		36.5	-10.5	24.5		0.24	0.51	-1.47	1.22		1.17	-0.5	0.01
682	1	60.78	5	78	1.77	24.9	0	80	0	4	184	76	66	13		29	-25.5	26.54	38	2.27	2.31	0.42	0.41		0.59	-1.94	0.27	0.63
683	1	64.45	5	76	1.85	22.21	0	86.83	0	3	140	47	68			10		24.7	31	1.29	0.22	0.5			-0.9		0.04	-0.05
684	1	60	5	76.5	1.8	23.61	0	85.33	0	3	55	59	18	10		30	-20.5		38	-0.61	1.09	-1.69	-0.2		0.66	-1.46		0.63
685	1	61.69	5	87.4	1.76	28.38	1	93	0	3	69	48	10	10		34	-13		37	-0.3	0.29	-2.04	-0.2		0.98	-0.74		0.53
686	1	62.37	5	66	1.67	23.67	0	85.5	0	2	101	47	9	8		18	-12	24.2		0.42	0.22	-2.08	-0.61		-0.27	-0.64	-0.03
687	1	63.44	5	77	1.77	24.58	0	90	0	4	120	48	8	10		23	-19	24.9		0.84	0.29	-2.13	-0.2		0.12	-1.32	0.06
688	1	63.16	5	77	1.81	23.5	0	85	0		112	70	66			26		30.74		0.66	1.88	0.42			0.35		0.8
689	1	62.97	5	72.4	1.72	24.47	0	94	1	3	54	38	63	13		25	4.75		22	-0.63	-0.42	0.29	0.41		0.27	0.97		-0.92
690	1	63.25	5	96	1.84	28.36	1	100	1	3	75	30	64	10		2	-19	22.7	21	-0.16	-1	0.33	-0.2		-1.52	-1.32	-0.22	-1.02
691	1	60.79	5	91.3	1.81	27.87	1	98	1	4	21	56	51	11		24	-15			-1.37	0.87	-0.24	0		0.2	-0.93
692	1	63.62	5	84.2	1.76	27.34	1	94	1	3	60	43	69	9		9	-12.75			-0.5	-0.06	0.55	-0.41		-0.98	-0.72
693	1	64.51	5	85.7	1.75	28.14	1	99.3	1	2	17	48	20		8	7	-23		37	-1.45	0.29	-1.6		0	-1.13	-1.7		0.53
694	1	61.35	5	79.1	1.66	28.71	1	100.75	1	3	88	47	65	6		-13	-35.5		26	0.13	0.22	0.37	-1.02		-2.7	-2.9		-0.53
695	1	62.71	5	83.9	1.83	25.05	1	101.67	1	2	0	36	17		6	18	-16			-1.83	-0.57	-1.73		-0.44	-0.27	-1.03
696	1	62.98	5	89	1.82	26.87	1	98.33	1	4	71	51	16	11		10	-22.5	15.9	24.5	-0.25	0.51	-1.78	0		-0.9	-1.65	-1.08	-0.68
697	1	63	5	80.8	1.73	27	1	96.17	1	4	45	39	15	6		13	-27.5		29.5	-0.83	-0.35	-1.82	-1.02		-0.66	-2.13		-0.19
698	1	61.65	5	80.8	1.69	28.29	1	99	1	2	80	44	24	7		3	-12		29	-0.05	0.01	-1.43	-0.82		-1.45	-0.64		-0.24
699	1	64.97	5	88.1	1.74	29.1	1	101.17	1	1	28	45	10		0	11	-30.75	23.6	40	-1.21	0.08	-2.04		-1.78	-0.82	-2.45	-0.1	0.83
700	1	62.07	5	77	1.71	26.33	1	97	1	3	57	44	63	6		26	1.5	22.3	27	-0.56	0.01	0.29	-1.02		0.35	0.65	-0.27	-0.44
701	1	62.88	5	91	1.83	27.17	1	98.17	1	4	120	58	64	8		25	-29	24.61	30	0.84	1.01	0.33	-0.61		0.27	-2.28	0.03	-0.15
702	1	64.81	5	83.1	1.74	27.45	1	94.67	1	2	105	39	64	7		22	-8.5		32	0.51	-0.35	0.33	-0.82		0.04	-0.31		0.05
703	1	62.9	5	84.6	1.89	23.68	0	97.67	1	2	240	56	42	6		18	-5.5	26.6		3.51	0.87	-0.64	-1.02		-0.27	-0.02	0.28
704	1	63.41	5	90	1.93	24.16	0	99	1	3	63	32	34		3	21	-13.5	19.1		-0.43	-0.86	-0.99		-1.11	-0.04	-0.79	-0.67
705	1	63.13	5	104.8	1.77	33.45	2	117	2	2	33	47	45			12	-29.5		26	-1.1	0.22	-0.5			-0.74	-2.33		-0.53
706	1	64.59	5	64	1.76	20.66	0	105.5	2	1	32	59	2	8		5	-26.5		31	-1.12	1.09	-2.39	-0.61		-1.29	-2.04		-0.05
707	1	62.25	5	83.2	1.8	25.82	1	103.5	2	2	63	54	65	10		16.5	-32.5		36	-0.43	0.73	0.37	-0.2		-0.39	-2.62		0.44
708	1	61.32	5	108.2	1.88	30.61	2	106.33	2	3	35	55	66		21	19	-3.5			-1.05	0.8	0.42		2.89	-0.2	0.17
709	1	63.52	5	90.4	1.73	30.08	2	105	2	2	44	48	10	6		-9	-20		27	-0.85	0.29	-2.04	-1.02		-2.38	-1.41		-0.44
710	1	61.71	5	98.8	1.83	29.5	1	108.33	2	3	35	57	57	7		27.5	-12.5			-1.05	0.94	0.02	-0.82		0.47	-0.69
711	1	62.36	5	106	1.85	30.97	2	113	2	2	66	46	32	3		5	-28	22.5	24	-0.36	0.15	-1.07	-1.63		-1.29	-2.18	-0.24	-0.73
712	1	64.62	5	96.3	1.81	29.39	1	102.5	2	4	15	56	4	0	8	23	4		25	-1.5	0.87	-2.3	-2.24	0	0.12	0.89		-0.63
713	1	62.72	5	95.2	1.82	28.74	1	104.67	2	1	119	55	37	10		8	-8.5	20.58	28	0.82	0.8	-0.86	-0.2		-1.05	-0.31	-0.48	-0.34
714	1	63.19	5	91	1.68	32.24	2	104.33	2	1	69	38	11	8		23	-22	17.83	24	-0.3	-0.42	-2	-0.61		0.12	-1.61	-0.83	-0.73
715	1	63.67	5	90.8	1.8	28.02	1	109.83	2	2	34	43	20	7		26	-19.5	18.61	24	-1.08	-0.06	-1.6	-0.82		0.35	-1.37	-0.73	-0.73
716	1	60.68	5	111	1.76	36.04	2	118.67	2	3	38	47	23	9		21	-46.5		20.5	-0.99	0.22	-1.47	-0.41		-0.04	-3.96		-1.07
717	1	63.76	5	90	1.74	29.73	1	104	2	3	5	29	11	9		28	-11		25	-1.72	-1.07	-2	-0.41		0.51	-0.55		-0.63
718	1	61.54	5	115	1.81	35.1	2	118	2	2	13	41	40		4	5	-26			-1.54	-0.21	-0.72		-0.89	-1.29	-1.99
719	1	62.25	5	114	2.02	27.94	1	108.25	2	3	11	58	13	8		8	-16.5			-1.59	1.01	-1.91	-0.61		-1.05	-1.08
720	1	62.58	5	89	1.83	26.58	1	102.67	2	2	30	46	17		15	21	-23	28.66		-1.16	0.15	-1.73		1.56	-0.04	-1.7	0.54
721	1	62.92	5	101.5	1.74	33.52	2	115	2	2	33	45	11	9		13	-18.5	15.9		-1.1	0.08	-2	-0.41		-0.66	-1.27	-1.08
722	1	63.99	5	101.5	1.88	28.72	1	115.75	2	3	9	54	30		10	2	-18	18.06		-1.63	0.73	-1.16		0.44	-1.52	-1.22	-0.8
723	1	64.42	5	97	1.81	29.61	1	106.5	2	1		46	6			31					0.15	-2.21			0.74
724	1	64.79	5	102	1.86	29.48	1	108	2	4	65	70	3	9		8	-12.5	26.1		-0.39	1.88	-2.35	-0.41		-1.05	-0.69	0.22
725	1	64.87	5	83.2	1.73	27.8	1	104.67	2	1	39	56	6	9		10.5	-22	20.4		-0.96	0.87	-2.21	-0.41		-0.86	-1.61	-0.51
726	1	60.25	5	120	1.8	37.04	2	121.5	2	2	12	52	63	1		22	-37.5	16.9		-1.57	0.58	0.29	-2.04		0.04	-3.1	-0.95

## Sheet: labels
Gender	Females are given the value 1 and males the value 2
Age 10yr groups	1=20.0-29.9, 2=30.0-39.9, 3=40.0-49.9, 4=50.0-59.9, 5=60.0-64.9
BMI groups	0= normal weight, 1=overweight, 2=obese
WC WHO groups	0= no risk, 1=increased risk, 2=highly increased risk
Educational level	1= <high school, 2= high school, 3= <4 yr university, 4= ≥university
